# Supplementary material for: New Methods Used in Pharmacokinetics and Therapeutic Monitoring of the First and Newer Generations of Antiepileptic Drugs (AEDs)
Source: PubMed Central journal article supplement (PMC7663638; doi:10.3390/molecules25215083), 2020-11-02
Supplement: molecules-25-05083-s001.pdf [file molecules-25-05083-s001.pdf]

**Table 1.** Characteristics of AEDs.

| Drug                          | Generation | Drug Approval Date                                       | Chemical Classification/Structure, Molecular Mass [g/mol]                                                                                | Mechanism of Action                                                                                              | Pharmacokinetics/Metabolism                                                                                                                                                                                                                                                     | Therapeutic Range [mg/L] | Drug-Drug Interactions                                                                                                                                  | Ref.                  |
|-------------------------------|------------|----------------------------------------------------------|------------------------------------------------------------------------------------------------------------------------------------------|------------------------------------------------------------------------------------------------------------------|---------------------------------------------------------------------------------------------------------------------------------------------------------------------------------------------------------------------------------------------------------------------------------|--------------------------|---------------------------------------------------------------------------------------------------------------------------------------------------------|-----------------------|
| Brivaracetam (BRV)            | III        | 2016 (USA)                                               | ((2S)-2-((4R)-2-oxo-4-propylpyrrolidinyl)butanamide<br>C <sub>11</sub> H <sub>20</sub> N <sub>2</sub> O <sub>2</sub><br>212.288          | acting on SV2A, through the synaptic GABA release, sodium channels inhibitor                                     | bioavailability ~100%, T <sub>max</sub> 1 h, T <sub>0.5</sub> 7–8 h, <20% bound to plasma proteins, metabolized by hydrolysis and oxidation, >95% excreted in urine with <10% of compound unchanged<br>bioavailability 75–85%, T <sub>max</sub> 19 ± 7 h, T <sub>0.5</sub> 35 h | 0.2–2.0                  | baclufen with BRV increase adverse effect, CBZ may increase the thyroid function activities of BRV and VPA decreases.                                   | [94,95,97]            |
| Carbamazepine (CBZ)           | I          | 1965 (UK)<br>1968 (USA)                                  | Benzo(b)(1)benzazepine-11-carboxamide<br>C <sub>15</sub> H <sub>12</sub> N <sub>2</sub> O<br>236.269                                     | inhibition of the voltage-gated sodium channel (VGSC)                                                            | protein binding 65–85%, hepatic metabolism via CYP3A4/5 and in a lesser extent CYP 2C8, main active epoxide metabolite—(CBZE), excreted in the urine as N-glucuronide (15%)                                                                                                     | 4–12                     | PHT, PB, PRM increase CBZ clearance and reduce its half-life. VPA inhibits epoxide hydrolase, and CYP 3A4 inhibitors increase CBZ and CBZE blood levels | [10,29,43,69,189,190] |
| Cenobamate (CNB)              | new        | 2019 (USA)                                               | ((1R)-1-(2-chlorophenyl)-2-(tetrazol-2-yl)ethyl) carbamate<br>C <sub>10</sub> H <sub>10</sub> ClN <sub>5</sub> O <sub>2</sub><br>267.670 | positively modulates γ-GABA <sub>A</sub> and inhibits voltage gated sodium channels                              | bioavailability 88%, T <sub>max</sub> 1–4 h, T <sub>0.5</sub> 50–60 h, 60% protein bound in plasma, extensively metabolised in the liver via glucuronidation and oxidation                                                                                                      | NA                       | CNB inhibits CYP2C19: decreases PHT and PHB; induces CYP3A4: decreases LTG; PH causes decreases CNB                                                     | [1,2,185–187]         |
| Clobazam (CLB)                | I          | 1975 (anxiolytic)<br>1984 (anticonvulsant)<br>2011 (USA) | 7-chloro-1-methyl-5-phenyl-1,5-benzodiazepine-2,4-dione<br>C <sub>16</sub> H <sub>13</sub> ClN <sub>2</sub> O <sub>2</sub><br>300.740    | inhibitory effect of GABA on neuronal excitability by increasing neuronal membrane permeability to chloride ions | bioavailability ~100%, T <sub>max</sub> 1–4 h, T <sub>0.5</sub> 10–30 h<br>plasma protein-binding 80–90%, main metabolite -N-desmethylclobazam (N-CLB), hepatic elimination (98%), excreted renally                                                                             | 0.03–0.3                 | CBZ, PHT, PB induced CLB metabolism and increased N-CLB levels, cimetidine (an inhibitor of several CYPs (CYP 2C19) increased N-CLB concentration       | [29,82,191]           |
| Eslicarbazepine Acetate (ESL) | III        | 2010 (Europe)<br>2013 (USA)                              | 5-oxo-6H-benzo(b)(1)benzazepine-11-carboxamide<br>C <sub>15</sub> H <sub>12</sub> N <sub>2</sub> O <sub>2</sub><br>296.326               | competitive inhibitor of VGSC                                                                                    | bioavailability > 90%, <40% protein binding, T <sub>max</sub> 1–4 h, T <sub>0.5</sub> 13–20 h, main metabolite: S-licarbazepine, renal elimination (>90%), mainly as ESL (52%) and ESL-glucuronide (41%)                                                                        | 3–26                     | interaction with other AEDs: PHT, PB, CBZ, oral contraceptive (ethinylestradiol and levonorgestrel) and simvastatin                                     | [4,29,45,79,80,193]   |

Table 1. Cont.

|                     |     |                             |                                                                                                                             |                                                                                                                                                           |                                                                                                                                                                                                                                      |        |                                                                                                                                                                                         |               |
|---------------------|-----|-----------------------------|-----------------------------------------------------------------------------------------------------------------------------|-----------------------------------------------------------------------------------------------------------------------------------------------------------|--------------------------------------------------------------------------------------------------------------------------------------------------------------------------------------------------------------------------------------|--------|-----------------------------------------------------------------------------------------------------------------------------------------------------------------------------------------|---------------|
| Ethosuximide (ESM)  | I   | 1960 (USA)                  | 3-ethyl-3-methylpyrrolidine-2,5-dione<br>C <sub>7</sub> H <sub>11</sub> NO <sub>2</sub><br>141.168                          | voltage-gated T-type calcium channels                                                                                                                     | bioavailability 90–100%, T <sub>max</sub> 1–7 h, T <sub>0.5</sub> 25–60 h, protein binding unknown, hepatic extensive metabolism by CYP3A4 and CYP2E1, clearance may be saturable (nonlinear) at higher doses, renal elimination 20% | 40–100 | CBZ, PHB, PHT, PRM, and rifampicine increase elimination, in consequence, decrease the plasma level of ESM. STP, isoniazid inhibits metabolism of ESM and increase ESM plasma levels    | [27,29,38]    |
| Felbamate (FBM)     | II  | 1993 (USA)                  | 2-phenyl-1,3-propanediol dicarbamate<br>C <sub>11</sub> H <sub>14</sub> N <sub>2</sub> O <sub>4</sub><br>238.239            | weak inhibitor on GABA- and benzodiazepine receptor, antagonist at the strychnine-insensitive glycine recognition site of NMDA receptor-ionophore complex | bioavailability > 90%, T <sub>max</sub> 1–4 h, T <sub>0.5</sub> 20–23h, protein binding 20–36%, hepatic metabolism (50% to inactive products)                                                                                        | 30–60  | CBZ, PHT, PB increase whereas VPA decreases its metabolism                                                                                                                              | [119,120]     |
| Gabapentin (GBP)    | II  | 1993 (USA)                  | 1-(aminomethyl)cyclohexaneacetic acid<br>C <sub>9</sub> H <sub>17</sub> NO <sub>2</sub><br>171.237                          | inhibits α2-δ subunit of voltage-gated calcium channels                                                                                                   | non-linear pharmacokinetics, bioavailability < 60%, T <sub>max</sub> 2–3 h, T <sub>0.5</sub> 5–9 h, not metabolized, not protein bound, renal elimination                                                                            | 2–20   | hydrocodone, cimetidine, morphine, and naproxen increase, whereas antacids decrease its concentration strong interaction with selective serotonin 5-HT <sub>3</sub> receptor antagonist | [138,193]     |
| Lacosamide (LCM)    | III | 2008 (Europe)<br>2009 (USA) | (R)-2-acetamido-N-benzyl-3-methoxypropionamidel<br>C <sub>12</sub> H <sub>18</sub> N <sub>2</sub> O <sub>3</sub><br>250.294 | inhibits sodium channel, selective inhibitor of depolarized neurons, binds to collapsin response mediator protein-2 (CRMP-2)                              | bioavailability~100%, T <sub>max</sub> 1–4 h, T <sub>0.5</sub> ~13h, <15% bound to plasma proteins, as a CYP2C19 substrate, excreted unchanged (40%) with its inactive O-desmethyl metabolite (30%)                                  | 3–10   | (dolasetron) or antiretroviral protease inhibitor (saquinavir). Interact with beta-blockers like metoprolol and diltiazem or verapamil                                                  | [161,162,194] |
| Lamotrigine (LTG)   | II  | 1994 (USA)                  | 3,5-diamino-6-(2,3-dichlorophenyl)-as-triazine<br>C <sub>9</sub> H <sub>7</sub> Cl <sub>2</sub> N <sub>5</sub><br>256.091   | inhibits a voltage-sensitive sodium channels, modulates the release of aspartate and glutamate                                                            | bioavailability > 95%, T <sub>max</sub> 1–3 h, T <sub>0.5</sub> 15–35 h, protein binding 66%, extensively metabolized via glucuronidation                                                                                            | 2.5–15 | LTG increases VPA                                                                                                                                                                       | [29,195]      |
| Levetiracetam (LEV) | II  | 1999 (USA)                  | (-)(S)-α-ethyl-2-oxo-1-pyrrolidine acetamide<br>C <sub>8</sub> H <sub>14</sub> N <sub>2</sub> O <sub>2</sub><br>170.212     | acting on SV2A, indirectly GABAergic neurotransmitter and ionic currents modulator, in vitro inhibitor of N-type calcium channels                         | bioavailability ~100%, T <sub>max</sub> 1.3 h, T <sub>0.5</sub> ~6–8 h, enzymatic hydrolysis to inactive carboxylic acid metabolite (L057), 66% excreted in the urine as unchanged drug                                              | 5–41   | LEV interact with alcohol, antihistamines, antipsychotics or benzodiazepines, SSRI and other seizure drugs like CBZ, VPA or ZNS                                                         | [96,98]       |

**Table 1. Cont.**

|                                        |     |                                            |                                                                                                                                                                                                                      |                                                                                                                          |                                                                                                                                                                                                                                                                                                               |                             |                                                                                                                                                                                                                                                                                                                                                                                                                                          |                          |
|----------------------------------------|-----|--------------------------------------------|----------------------------------------------------------------------------------------------------------------------------------------------------------------------------------------------------------------------|--------------------------------------------------------------------------------------------------------------------------|---------------------------------------------------------------------------------------------------------------------------------------------------------------------------------------------------------------------------------------------------------------------------------------------------------------|-----------------------------|------------------------------------------------------------------------------------------------------------------------------------------------------------------------------------------------------------------------------------------------------------------------------------------------------------------------------------------------------------------------------------------------------------------------------------------|--------------------------|
| Oxcarbazepine (OXC)                    | II  | 2000 (USA)                                 | 10,11-dihydro-10-oxo-5H-dibenz (b,f) azepine-5-carboxamide<br>C <sub>15</sub> H <sub>12</sub> N <sub>2</sub> O <sub>2</sub><br>-252.269                                                                              | inhibition of the voltage-gated sodium channel (VGSC)                                                                    | bioavailability >95%,<br>T <sub>max</sub> 1–3 h, T <sub>0.5</sub> 1–5 h,<br>60% protein binding, main active metabolite - 10,11-dihydro-10-hydroxy-carbazepine, clearance route: hepatic (50%) and renal (50%)                                                                                                | 10–35                       | dose dependent effect of the metabolism of dihydropyridine antagonists, oral contraceptives and some antiepileptic drugs (CBZ)                                                                                                                                                                                                                                                                                                           | [29,43,68,191]           |
| Perampanel (PER)                       | III | 2012 (USA)                                 | 2-(2-oxo-1-phenyl-5-pyridin-2-ylpyridin-3-yl)benzoxazole<br>C <sub>23</sub> H <sub>18</sub> N <sub>3</sub> O<br>349.393                                                                                              | selective, noncompetitive AMPA (α-amino-3-hydroxy-5-methyl-4-isoxazolepropionic acid) type glutamate receptor antagonist | bioavailability: ~100%,<br>T <sub>max</sub> 0.5–2 h, T <sub>0.5</sub> ~105 h<br>95% plasma protein binding, extensive hepatic metabolism (>90%),<br>excreted as oxidative and conjugated metabolites with urine and feces                                                                                     | 0.1–1.0                     | PER interacts with other AEDs (OXC, TPM, VPA, CBZ, PHT), alcohol, benzodiazepines, narcotics, barbiturates, antihistamines                                                                                                                                                                                                                                                                                                               | [4,29,44,45,168,169,191] |
| Phenobarbital (PHB)                    | I   | 1912 (Germany)                             | 5-ethyl-5-phenyl barbituric acid<br>C <sub>12</sub> H <sub>12</sub> N <sub>2</sub> O <sub>3</sub><br>232.235                                                                                                         | interaction with GABA <sub>A</sub> and increase in chloride ions in neuron and finally reduce neuronal excitability      | bioavailability > 95%, T <sub>max</sub> 2–3 h,<br>T <sub>0.5</sub> 30–173 h in adults; 50 h in children, 20–45% plasma protein binding, extensively (>70%) metabolized by isoenzymes of cytochromes CYP2C9, CYP2C19, and CYP2E1                                                                               | 10–40                       | interactions are results of inducing effect of phenobarbital on CYP1A2, CYP3A6, CYP2B, CYP2C, CYP3A4 and UTGs and is observed decreased level of AEDs and beta-blockers, calcium channel blockers, digoxin, hormonal contraceptives statins: lovastatin, simvastatin, cerivastatin, and atorvastatin, vitamin decreased level of CBZ and CBZE, clonazepam, FBM, LTG, OXC, PER, PRM, RFM, TPM, VPA, ZNS, TGB, decreased level of digoxin, | [14–18]                  |
| Phenytoin (PHT) and Fosphenytoin (FOS) | I   | 1908 (Germany)<br>1953 (USA)<br>1996 (USA) | 5,5'-diphenylhydantoin<br>C <sub>15</sub> H <sub>12</sub> N <sub>2</sub> O <sub>2</sub><br>252.268<br>(3-phosphoryloxymethyl)phenytoin<br>C <sub>16</sub> H <sub>15</sub> N <sub>2</sub> O <sub>6</sub> P<br>362.274 | modulation of voltage-gated sodium channels- enhances rapid inactivation of sodium channels                              | hepatic metabolism in 98%, by the isoenzyme CYP2C9 and CYP2C9. Biological half-life elimination is generally in the range 7–42 h and can be extended because of saturable pharmacokinetics, T <sub>0.5</sub> 15 min to convert FOS to PHT. Phenytoin is an inducer of CYP3A4, CYP2C9, CYP2C19, CYP1A2 and UGT | 10–20 (total)<br>1–2 (free) | hormonal contraceptive, ibrutinib, nilotinib, proton pump inhibitors, quinidine, sirolimus, tacrolimus, statins, telaprevir, vitamin D and folic acid                                                                                                                                                                                                                                                                                    | [25–29]                  |

**Table 1. Cont.**

|                   |     |                                      |                                                                                                                                         |                                                                                                                                                 |                                                                                                                                                                                                                                                                                                                                     |                            |                                                                                                                               |            |
|-------------------|-----|--------------------------------------|-----------------------------------------------------------------------------------------------------------------------------------------|-------------------------------------------------------------------------------------------------------------------------------------------------|-------------------------------------------------------------------------------------------------------------------------------------------------------------------------------------------------------------------------------------------------------------------------------------------------------------------------------------|----------------------------|-------------------------------------------------------------------------------------------------------------------------------|------------|
| Piracetam (PIR)   | I   | 1970 (Europe)                        | (2-oxo-pyrrolidin-1-yl)-acetamide<br>C <sub>8</sub> H <sub>10</sub> N <sub>2</sub> O <sub>2</sub><br><a href="#">142.158</a>            | nootropic modulator of cerebral function, positive allosteric regulator of AMPA (α-amino-3-hydroxy-5-methyl-4-isoxazolepropionic acid) receptor | bioavailability ~100%, T <sub>max</sub> 1–1.5 h, T <sub>0.5</sub> ~5 h, not protein-bound, renal elimination as unchanged drug (not known major metabolism)                                                                                                                                                                         | NA                         | PIR increases level of CBZ, cisplatin, digoxin, estradiol acetate, lithium, carbonate, procainamid, tiapride, vancomycin      | [86]       |
| Pregabalin (PGB)  | II  | 2004 (USA)                           | (S)-3-(aminomethyl)-5-methylhexanoic acid<br>C <sub>8</sub> H <sub>17</sub> NO <sub>2</sub><br>159.226                                  | inhibits α2-δ subunit of voltage-gated calcium channels                                                                                         | bioavailability > 90%, T <sub>max</sub> 1–2 h, T <sub>0.5</sub> 5–7 h, not metabolized, not protein bound, renal elimination bioavailability 60–100%, t <sub>0.5</sub> 10–12 h (PEMA), 29–36 h (PHB), renal excretion 40–60% unchanged, hepatic metabolism CYP2C9, CYP2C19, active metabolites—phenylethylmalonamide (PEMA) and PHB | 2–5                        | GBP and PHT decrease its concentration                                                                                        | [29,138]   |
| Primidone (PRM)   | I   | 1954 (USA)                           | 5-Ethyl-5-phenyl-1,3-diazinane-4,6-dione<br>C <sub>12</sub> H <sub>14</sub> N <sub>2</sub> O <sub>2</sub><br>218.252                    | binds synaptic and extrasynaptic GABA <sub>A</sub> receptors                                                                                    | bioavailability 70–85%, T <sub>max</sub> 4–6 h, T <sub>0.5</sub> 6–10 h, ~40% bound to plasma proteins, no active metabolites, excreted renally (66% as CGP 47292 metabolite and 2% as unchanged drug)                                                                                                                              | 5–12 (PRM), 15–40 as (PHB) | interactions similar to PHB, are results of inducing effect of phenobarbital on CYP1A2, CYP3A6, CYP2B, CYP2C, CYP3A4 and UGTs | [26,29,35] |
| Rufinamide (RFM)  | III | 2007 (Europe) 2008 (U[29,126,196]SA) | 1-(2,6-difluorobenzyl)-1H-1,2,3-triazole-4-carboxamide<br>C <sub>10</sub> H <sub>8</sub> F <sub>2</sub> N <sub>4</sub> O<br>238.194     | sodium channel inhibitor                                                                                                                        | non-linear pharmacokinetics, bioavailability not available, T <sub>max</sub> 0.5–2 h, T <sub>0.5</sub> 4.5–13 h, protein binding 96%, extensive metabolism by the CYP1A2, CYP2C19, and CYP3A4 hydroxylation and renal excretion 30–60%, C <sub>max</sub> 0.02 and 1.88 mg/L after 50 and 200 mg dose.                               | 5–30                       | RFM as a mild interactor, increase the clearance of oral contraceptives (ethinyl estradiol, norethindrone)                    | [197,198]  |
| Stiripentol (STP) | III | 2018 (USA)                           | 4,4-dimethyl-1-(3,4-methylenedioxy)-phenyl-1-penten-3-ol<br>C <sub>14</sub> H <sub>18</sub> O <sub>5</sub><br>234.295                   | increases the activity of GABA <sub>A</sub> receptors                                                                                           | Dose-dependent, plasma T <sub>0.5</sub> 40–90h, whole blood T <sub>0.5</sub> 253–313 h bioavailability ≤90%, T <sub>max</sub> 0.5–2 h, T <sub>0.5</sub> 5–9 h, protein binding 98% extensively metabolized by CYP3A4                                                                                                                | 4–22                       | inhibits CYP 1A2, 3A4, 2C19, 2D6; increases CBZ, CLB, PHT, PB and VPA                                                         | [199–201]  |
| Sulthiame (STM)   | I   | 1950 (Germany)                       | 4(1,1-dioxothiazinan-2-yl)benzenesulfonamide<br>C <sub>10</sub> H <sub>14</sub> N <sub>2</sub> O <sub>5</sub> S <sub>2</sub><br>290.359 | membrane— a permeant inhibitor of the enzyme carbonic anhydrase                                                                                 |                                                                                                                                                                                                                                                                                                                                     | 5–35                       | CBZ and PRM, PHT increase the elimination of STM; antacids decrease GI absorption.                                            | [4,38,42]  |
| Tiagabine (TGB)   | II  | 1996 (Denmark) 1997 (USA)            | N-(4,4-di(3-methylthien-2-yl)but-3-enyl)nicotinic acid<br>C <sub>20</sub> H <sub>25</sub> NO <sub>2</sub> S <sub>2</sub><br>375.548     | inhibits GABA reuptake into neurons and glia                                                                                                    |                                                                                                                                                                                                                                                                                                                                     | 0.02–0.3                   | CBZ, PHT, PB increase its clearance, VPA increases free fraction                                                              | [29,202]   |

Table 1. Cont.

|                     |     |                                          |                                                                                                                                                             |                                                                                                                                                                                 |                                                                                                                                                                                                                                                                                                                                                  |              |                                                                                                       |                        |
|---------------------|-----|------------------------------------------|-------------------------------------------------------------------------------------------------------------------------------------------------------------|---------------------------------------------------------------------------------------------------------------------------------------------------------------------------------|--------------------------------------------------------------------------------------------------------------------------------------------------------------------------------------------------------------------------------------------------------------------------------------------------------------------------------------------------|--------------|-------------------------------------------------------------------------------------------------------|------------------------|
| Topiramate (TPM)    | II  | 1996 (USA)                               | 2,3:4,5-Bis-O-(1-methylethylidene)-beta-D-fructopyranose sulfamate<br>C <sub>12</sub> H <sub>21</sub> NO <sub>8</sub> S<br>361.362                          | Inhibits voltage-dependent sodium and calcium channels, it also inhibits carbonic anhydrase activity. Enhances the inhibitory effect of GABA.                                   | bioavailability >80%, T <sub>0.5</sub> 20–30 h, metabolism mainly by hydroxylation, hydrolysis glucuronidation, and sulfonation<br>20–30% metabolized in monotherapy, increase to 50–70% in polytherapy with CBZ and PHT                                                                                                                         | 5–20<br>2–10 | TPM clearance is increased by CBZ, OXC, and PHT, but decreased by lithium, propranolol, amitriptyline | [26,45,113]            |
| Valproic acid (VPA) | II  | 1967 (France)<br>1978 (USA)              | 2-propylpentanoic acid<br>C <sub>8</sub> H <sub>16</sub> O <sub>2</sub><br>144.211                                                                          | increases the inhibitory activity of GABA, blocks voltage-gated ion channels, inhibits histone deacetylase                                                                      | non-linear pharmacokinetic, bioavailability 90–100%, T <sub>max</sub> 1–7 h, T <sub>0.5</sub> 9–16 h, protein binding 85–95%, extensive metabolism via β-oxidation glucuronidation and CYP-mediated oxidation<br>bioavailability 60–80%, T <sub>max</sub> 1–2 h, T <sub>0.5</sub> 5–8 h, protein binding 17%, not metabolized, renal elimination | 50–100       | inhibits CYP2C9, CYP3A4, and epoxide hydrolase: increases CBZ, ESM, LTG, PHB and RFM                  | [29,126,196]           |
| Vigabatrin (VGB)    | III | 2003 (Mexico)<br>2009 (USA)              | <b>4-amino-5-hexenoic acid</b><br>C <sub>6</sub> H <sub>11</sub> NO <sub>2</sub><br>129.157                                                                 | inhibits GABA-transaminase                                                                                                                                                      | bioavailability ≥ 90%, T <sub>max</sub> 2–5 h, T <sub>0.5</sub> ~60 h                                                                                                                                                                                                                                                                            | 0.8–36       | FBM increases its elimination                                                                         | [29,126,203]           |
| Zonisamide (ZNS)    | II  | 1989 (Japan)<br>2000 (USA) 2005 (Europe) | 1,2-benzisoxazole-3-methanesulfonamide<br>1,2-benzoxazol-3-ylmethanesulfonamide<br>C <sub>8</sub> H <sub>8</sub> N <sub>2</sub> O <sub>3</sub> S<br>212.226 | double mechanism of action due to weak enzyme inhibition and modulation of GABA-ergic and glutamate neurotransmission by changing voltage sensitive sodium and calcium channels | protein binding (40–50%), hepatic metabolism through CYP3A4 (acetylation and reduction, forming N-acetyl zonisamide and 2-sulfamoyl acetyl phenol), excreted primarily in urine as parent drug and as the glucuronide of a metabolite                                                                                                            | 10–40        | significantly increases CBZ elimination via induction of CYP3A4, PHT and PB induce ZNS metabolism     | [10,29,45,157,191,192] |

**Table 2.** Recent methods for analysis of AEDs in biological matrices.

| Analyzed Drugs | Biological Matrix                                 | Sample Preparation                                                                                                                                            | Method                                                                                      | Column and Mobile Phase                                                                              | LOQ; Calibration Range                                                                   | Application                                                                                                          | Co-Detected Compounds                                                           | Ref   |
|----------------|---------------------------------------------------|---------------------------------------------------------------------------------------------------------------------------------------------------------------|---------------------------------------------------------------------------------------------|------------------------------------------------------------------------------------------------------|------------------------------------------------------------------------------------------|----------------------------------------------------------------------------------------------------------------------|---------------------------------------------------------------------------------|-------|
| Brivaracetam   | plasma                                            | Protein precipitation with acetonitrile                                                                                                                       | UHPLC-MS/MS<br>m/z: 213.07 → 168.15 (BRV),<br>210.10 → 175.19 (IS)                          | Synergi Fusion column (75 m × 2.0 mm, 5 μm)<br>0.1% formic acid in water/acetonitrile, gradient mode | 0.1 mg/L;<br>0.1–10 mg/L                                                                 | Therapeutic drug monitoring in epilepsy patients                                                                     | Brivaracetam-d7 (IS)                                                            | [99]  |
| Brivaracetam   | liver and kidney tissue homogenates, blood (rats) | SPE (off-line)                                                                                                                                                | LC-MS/MS<br>m/z: 214.0 → 168.0 (BRV-AC),<br>230.0 → 184.0 (BRV-OHAC),<br>233.0 → 188.0 (IS) | Waters Atlantis T3 C18 (50 mm × 2.1 mm, 5 μm)<br>Water and acetonitrile (99:1, v/v), gradient mode   | 0.001 mg/L;<br>0.001–0.2 mg/L                                                            | In vitro metabolism assay                                                                                            | BRV metabolites (carboxylic-BRV-AC and hydroxylated-BRV-OHAC); Seletacetam (IS) | [107] |
| Brivaracetam   | plasma                                            | LLE with tert-Butyl methyl ether                                                                                                                              | UHPLC-MS/MS<br>m/z: 213.12 → 237.06 (BRV),<br>237.06 → 193.25 (IS)                          | Aquity BEH C18 column (100 mm × 2.1mm, 1.7 μm)<br>acetonitrile:0.1% formic acid in water             | 0.002 mg/L;<br>0.002–2 mg/L                                                              | Pharmacokinetics study in rats and therapeutic drug monitoring, pharmacokinetic study, forensic analysis             | CBZ (IS)                                                                        | [102] |
| Carbamazepine  | urine                                             | Dispersive LLME (a mixture of acetonitrile and urine sample—homogenous solution) with solid sodium chloride)                                                  | GC-FID                                                                                      | HP-5 capillary column (30 m × 0.32 mm, 0.25 μm)<br>Carrier gas: nitrogen                             | 0.033 mg/L;<br>0.04–100 mg/L                                                             | To determine and detect carbamazepine and phenobarbital in urine                                                     | PHB                                                                             | [58]  |
| Carbamazepine  | plasma and urine                                  | Ultrasound—assisted emulsification microextraction (SAEME) with 1-octanol in water                                                                            | GC-FID                                                                                      | DB5 (25 m × 0.32 mm; 0.25 μm)<br>Carrier gas: helium                                                 | 1.2 mg/L (plasma);<br>5.0–500 mg/L (plasma)<br>0.6 mg/L (urine);<br>2.5–500 mg/L (urine) | Analysis of carbamazepine in biological samples                                                                      | None                                                                            | [46]  |
| Carbamazepine  | dried blood spot (DBS)                            | LLE with acetonitrile and sodium hydroxide (24:1, v/v) followed by derivatization with N-methyl-N-trimethylsilyl-trifluoroacetamide and trimethylchlorosilane | GC-MS<br>m/z: 193 (CBZ), 201 (VPA), 281 (PHT),<br>267 (IS)                                  | DB5 (30 m × 0.25 mm, 0.25 μm)                                                                        | 0.07 mg/L;<br>0.5–120 mg/L                                                               | TDM<br>169 patients with epilepsy (PWE) on mono- or polytherapy of CBZ, PHT or/and VPA were included in the analysis | VPA, PHT, 5-(p-methylphenyl)-5-phenylhydantoin (IS)                             | [63]  |

Table 2. Cont.

|               |                          |                                                                                   |                                                                                                                   |                                                                                                                                                       |                            |                                                                |                                               |      |
|---------------|--------------------------|-----------------------------------------------------------------------------------|-------------------------------------------------------------------------------------------------------------------|-------------------------------------------------------------------------------------------------------------------------------------------------------|----------------------------|----------------------------------------------------------------|-----------------------------------------------|------|
| Carbamazepine | plasma                   | Protein precipitation with acetonitrile                                           | HPLC-UV<br>$\lambda=220$ nm                                                                                       | Nova-Pak® C18 Mixture of dihydrogen phosphate buffer (pH 6.0)-acetonitrile-2-propanol (63:22:15, v/v/v)                                               | 0.07 mg/L;<br>0.3–15 mg/L  | Determination of AED for a large number of a patient sample    | CBZE, PHB, PHT                                | [47] |
| Carbamazepine | plasma                   | Protein precipitation with chloroform                                             | HPLC-DAD<br>$\lambda=220$ nm                                                                                      | Intersil DS-4 C18 (150 mm × 4.6 mm, 5 $\mu$ m) acetonitrile-water (50:50, v/v)                                                                        | 0.5 mg/L;<br>0.05–16 mg/L  | Clinical study for monotherapy or polytherapy of carbamazepine | Propyloparaben (IS)                           | [51] |
| Carbamazepine | serum                    | LLE with ethyl acetate                                                            | HPLC-DAD<br>$\lambda=210$ –400 nm                                                                                 | Bonus-RP (150 mm × 0.46 mm, 5 $\mu$ m) acetonitrile/ $K_2$ HPO <sub>4</sub> buffer solution (45:55)                                                   | 0.1 mg/L;<br>0.1–9.1 mg/L  | TDM of CBZ                                                     | None                                          | [55] |
| Carbamazepine | dried saliva spots (DSS) | LLE with methanol and formic acid (pH 5.5) using Whatman TM903 protein saver card | HPLC-DAD<br>$\lambda=210$ nm                                                                                      | Zorbax SB-C18 (250 mm × 4.6 mm, 1.8 $\mu$ m) 35% acetonitrile/65% water-methanol-trimethylamine (75.5:24.2)                                           | 0.1 mg/L;<br>0.1–10 mg/L   | Alternative for AEDs blood monitoring                          | PHT, PHB                                      | [60] |
| Carbamazepine | plasma                   | Microextraction by packed sorbent (MEPS)                                          | HPLC-DAD<br>$\lambda=215$ nm (CBZ, CBZE, PB, LTG, PHT and LIC)<br>$\lambda=237$ nm (OXC)<br>$\lambda=280$ nm (IS) | LiChroCART® Purospher Star column C18 (55 mm × 4 mm, 3 $\mu$ m) acetonitrile (6%), mixture (94%) water-methanol-triethyloamine (73.2:26.5:0.3; v/v/v) | NA;<br>0.1–15 mg/L         | Routine TDM of CBZ, LTG, OXC, PB and PHT                       | LTG, OXC, PB, PHT, CBZE, LIC, ketoprofen (IS) | [65] |
| Carbamazepine | plasma or serum          | One step extraction by simultaneous protein and phospholipids precipitation       | UHPLC-MS/MS<br>m/z: 237.2 → 194.15 (CBZ), 253.2 → 208.14 (OXC), 255.2 → 194.15 (MHD), 297.3 → 194.09 (ESL)        | Intersil RP-HPLC (250 mm × 4.6 mm; 5 $\mu$ m) acetonitrile-methanol-ammonium acetate in water (32:3:65, v/v/v)                                        | 0.5 mg/L;<br>0.5–40 mg/L   | TDM                                                            | OXC, ESL, MHD, gatifloxacin (IS)              | [52] |
| Carbamazepine | plasma and saliva        | Protein precipitation with methanol                                               | LC-MS/MS<br>m/z: 237 → 194 (CBZ), 253 → 180 (CBZE), 251 → 108 (LCM)                                               | Zorbax SB-C18 (100 mm × 3 mm, 3.5 $\mu$ m) 0.1% formic acid in water and methanol (35:65, v/v)                                                        | 1.1 mg/L;<br>1.1–17.6 mg/L | Preclinical pharmacokinetic studies and TDM                    | CBZE, LCM (IS)                                | [53] |

Table 2. Cont.

|               |                                       |                                                                                                               |                                                                                                                                                                                                |                                                                                                                                                                                                                                                                                                    |                                                  |                                                                                          |                                                                                                        |       |
|---------------|---------------------------------------|---------------------------------------------------------------------------------------------------------------|------------------------------------------------------------------------------------------------------------------------------------------------------------------------------------------------|----------------------------------------------------------------------------------------------------------------------------------------------------------------------------------------------------------------------------------------------------------------------------------------------------|--------------------------------------------------|------------------------------------------------------------------------------------------|--------------------------------------------------------------------------------------------------------|-------|
| Carbamazepine | plasma                                | LLE with ethyl acetate                                                                                        | SFC-ESI-MS/MS (supercritical fluid chromatography/mass spectrometry)<br>m/z: 237.2 → 194.1 (CBZ), 253.1 → 180.1 (OXC), 255.1 → 193.0 (MHD), 338.2 → 78.0 (TPM), 285.2 → 193.1 (IS)<br>LC-MS/MS | UPC2TM BEH, 2EP (100 mm × 3 mm; 1.7 µm) carbon dioxide and methanol                                                                                                                                                                                                                                | 0.01 mg/L;<br>0.01–15 mg/L                       | TDM                                                                                      | TPM, OXC, MHD, diazepam (IS)                                                                           | [54]  |
| Carbamazepine | DBS                                   | LLE with methanol and ammonium formate with 0.15% formic acid in water using Whatman TM903 protein saver card | m/z: 237.2 → 178.9 (CBZ-I), 237.3 → 194.1 (CBZ-III), 245.2 → 200.1 (CBZ-d8), 247.4 → 204.1 (CBZ-d10), LTG-13C <sub>3</sub> (IS), LEV-d6 (IS), VPA-d6 (IS)                                      | Acquity UPLC BEH, C18 (50 mm × 2.1 mm, 1.7 µm) 10 mM ammonium formate with 0.15% formic acid and 100% methanol<br>Copper nanoclusters (CuNCs) coated with cetyl trimethylammonium bromide with 0.1 M/L phosphate buffer (pH = 5) Spursil C-18 10 mM ammonium formate and acetonitrile (60:40, v/v) | 2.5 µM/L (0.6 mg/L);<br>5–30 µM/L (1.2–7.1 mg/L) | Routine laboratory DBS analysis as an alternative matrix                                 | LTG, LEV and VPA CBZ-d8 (IS), CBZ-d10 (IS), LTG-13C <sub>3</sub> (IS), LEV-d6 (IS), VPA-d6 (IS)        | [64]  |
| Carbamazepine | exhaled breath condensate (EBC)       | Samples directly analyzed without pretreatment                                                                | HPLC-FLD<br>$\lambda_{exc}/\lambda_{em} = 290/480$ nm                                                                                                                                          | trimethylammonium bromide with 0.1 M/L phosphate buffer (pH = 5) Spursil C-18                                                                                                                                                                                                                      | 0.08 mg/L;<br>0.2–20 mg/L                        | Routine quantification of CBZ in clinical practices using a non-invasive sampling method | None                                                                                                   | [61]  |
| Cenobamate    | plasma (rats)                         | Protein precipitation with acetonitrile                                                                       | LC-MS/MS<br>m/z: 268.06 → 198 (CNB), 216.09 → 198.01 (IS)                                                                                                                                      | ammonium formate and acetonitrile (60:40, v/v)                                                                                                                                                                                                                                                     | NA;<br>0.01–5 mg/L                               | Pharmacokinetic studies in healthy subjects                                              | carisbamate (IS)                                                                                       | [186] |
| Cenobamate    | plasma                                | Protein precipitation                                                                                         | LC-MS/MS                                                                                                                                                                                       | NA                                                                                                                                                                                                                                                                                                 | 0.02 mg/L;<br>0.02–10 mg/L                       | Pharmacokinetic studies in healthy subjects                                              | GBP, LEV, PGB                                                                                          | [2]   |
| Cenobamate    | whole blood, plasma, urine and faeces | Protein precipitation                                                                                         | LC-MS/MS coupled with radio flow-through detector                                                                                                                                              | NA                                                                                                                                                                                                                                                                                                 | NA;<br>0.08–40 mg/L                              | Pharmacokinetics and mass balance assessment in healthy male subjects                    | CNB's eight metabolites                                                                                | [187] |
| Clobazam      | serum                                 | LLE with ethyl acetate and reconstitution with acetonitrile:water (80:20, v/v)                                | LC-MS/MS<br>m/z: 301 → 259 (CLB), 287 → 245 (N-CLB)                                                                                                                                            | Symmetry C18 (75 mm × 4.6 mm, 3.5 µm) methanol:water:acetonitrile (50:30:20, v/v/v) with 0.05% formic acid                                                                                                                                                                                         | 0.025 mg/L;<br>0.025–0.525 mg/L                  | TDM, applied in the clinical laboratory routine                                          | Clonazepam, N-CLB, tenazepam (IS), clonazepam-d4 (IS), clonazepam-8-chloroisomer-13C <sub>6</sub> (IS) | [84]  |



Table 2. Cont.

|                         |                                    |                                                                             |                                                                                                                                                                                                                                                                                                                                           |                                                                                                                                                                                                          |                                                               |                                                                |                                                                                                                                                                                                           |      |
|-------------------------|------------------------------------|-----------------------------------------------------------------------------|-------------------------------------------------------------------------------------------------------------------------------------------------------------------------------------------------------------------------------------------------------------------------------------------------------------------------------------------|----------------------------------------------------------------------------------------------------------------------------------------------------------------------------------------------------------|---------------------------------------------------------------|----------------------------------------------------------------|-----------------------------------------------------------------------------------------------------------------------------------------------------------------------------------------------------------|------|
| Clobazam                | plasma                             | Protein precipitation with methanol                                         | LC-MS/MS<br>m/z: 301 → 259 (CLB), 287 → 245 (N-CLB)                                                                                                                                                                                                                                                                                       | Phenomenex Kinetex Biphenyl (50 mm × 2.1 mm, 1.7 μm)<br>5 mM ammonium formate with 0.01% ammonium hydroxide and methanol                                                                                 | 0.002 mg/L;<br>0.002–0.75 mg/L                                | Bioequivalence/pharmacokinetic studies                         | N-CLB                                                                                                                                                                                                     | [85] |
| Eslicarbazepine acetate | plasma                             | SALLE                                                                       | HPTLC-UV<br>λ=217 nm (ESL and OXC)<br>λ= 265 nm (CBZ and OXC)                                                                                                                                                                                                                                                                             | Pre-coated silica gel plate G 60-F <sub>254</sub> (20 cm × 20 cm, 6–8 μm)<br>n-hexane- methylene chloride—ethanol-glacial acetic acid (50:40:10:0.1 v/v/v/v)<br>Intersil RP-HPLC (250 mm × 4.6 mm; 5 μm) | 72.82 ng/spot (14.56 mg/L);<br>150–1000 ng/spot (30–200 mg/L) | Clinical study in epileptic patients and pharmaceutical sample | OXC, CBZ                                                                                                                                                                                                  | [49] |
| Eslicarbazepine acetate | plasma or serum                    | One step extraction by simultaneous protein and phospholipids precipitation | UHPLC-MS/MS<br>m/z: 237.2 → 194.15 (CBZ), 253.2 → 208.14 (OXC), 255.2 → 194.15 (MHD), 297.3 → 194.09 (ESL)                                                                                                                                                                                                                                | Intersil RP-HPLC (250 mm × 4.6 mm; 5 μm)<br>acetonitrile-methanol-ammonium acetate in water (32:3:65, v/v/v)                                                                                             | 0.5 mg/L;<br>0.5–40 mg/L                                      | TDM                                                            | CBZ, OXC, MHD, gatifloxacin (IS)                                                                                                                                                                          | [52] |
| Eslicarbazepine acetate | postmortem blood, serum and plasma | Protein precipitation with methanol                                         | LC-MS/MS<br>m/z: 237.3 → 194.2 (CBZ), 253.1 → 236.1 (CBZE), 297.2 → 194.1 (ESL), 172.2 → 154.2 (GBP), 251.1 → 108.1 (LCM), 171.1 → 154.0 (LEV), 256.1 → 166.0 (LTG), 253.2 → 180.1 (OXC), 231.1 → 188.2 (PB), 160.2 → 142.2 (PGB), 217.2 → 159.2 (STP), 376.1 → 247.1 (TGB), 143.1 → 143.1 (VPA), 130.1 → 71.2 (VGB), 211.2 → 119.1 (ZNS) | Phenomenex Gemini C18 (150 mm × 2.1 mm, 5 μm)<br>2 mM ammonium acetate in water/2 mM ammonium acetate in methanol, gradient mode                                                                         | 0.5 mg/L;<br>0.5–50 mg/L                                      | Routine forensic toxicology and therapeutic drug monitoring    | CBZ, CBZE, ESL, OXC, S-licarbazepine, GBP, LCM, LTG, LEV, PGB, PB, PHT and its metabolite, retigabine and metabolite, STP, TPM, TGB, VPA, VGB, ZNS, tolbutamide (IS), 10,11-dihydrocarbamazepine, GBP-d10 | [81] |

Table 2. Cont.

|              |                                 |                                                           |                                                                                                                                    |                                                                                                                                                                                                                                                    |                                                            |                                                                     |                                                                                                             |       |
|--------------|---------------------------------|-----------------------------------------------------------|------------------------------------------------------------------------------------------------------------------------------------|----------------------------------------------------------------------------------------------------------------------------------------------------------------------------------------------------------------------------------------------------|------------------------------------------------------------|---------------------------------------------------------------------|-------------------------------------------------------------------------------------------------------------|-------|
| Ethosuximide | plasma                          | Microextraction with toluene combined with derivatization | LC-MALDI-TOF MS for analysis of ESM in plasma (MRM 190.05 and 379.09) and nano UPLC-LTQ Orbitrap for protein modification analysis | Concentrated column Symmetry C18 (180 mm × 20 mm, 5 μm)<br>Nano-flow column BEH (Ethylene Bridged Hybrid) C18 column (150 mm × 75 mm, 1.7 μm)<br>0.1% formic acid and acetonitrile with 0.1% formic acid                                           | 5 mg/L;<br>5–500 mg/L                                      | Healthy volunteer after intake<br>500 mg ESM                        | ESM-d3 (IS)                                                                                                 | [40]  |
| Ethosuximide | plasma dried plasma spots (DPS) | Methanol protein precipitation                            | LC-UV<br>λ=210 nm                                                                                                                  | Column XBridge C18 (250 mm × 4.6 mm, 3.5 μm)<br>acetonitrile and 50 mM phosphate buffer at pH = 4.5<br>Synergi Hydro-RP column (150 mm × 4.0 mm, 4 μm)<br>potassium dihydrogen phosphate buffer 50 mM pH = 4.5/acetoneitrile/methanol (65:35, v/v) | 9.6 mg/L;<br>9.6–192 mg/L                                  | TDM—epilepsy patients undergoing mono- or polytherapy               | Linezolid (IS), LEV, LTG, FBM, RFM, ZNS and monohydroxycarbamazepine                                        | [41]  |
| Felbamate    | plasma                          | Protein precipitation with acetonitrile                   | HPLC-UV<br>λ=210 nm                                                                                                                | XBridge C18 (250 mm × 4.6 mm, 3.5 μm)<br>50 mM phosphate buffer at Ph = 4.5/acetoneitrile, gradient mode                                                                                                                                           | 5 mg/L;<br>30–80 mg/L                                      | Therapeutic drug monitoring in plasma of 655 patients with epilepsy | LTG, 10,11-dihydro-10-hydroxy-5H-dibenzo[b,f]azepine-5-carboxamide, OXC metabolite), 4-methylprimidone (IS) | [123] |
| Felbamate    | plasma and DPS                  | Protein precipitation with methanol                       | HPLC-UV<br>λ=210 nm                                                                                                                |                                                                                                                                                                                                                                                    | 9.6 mg/L (plasma and DPS);<br>2.4–96 mg/L (plasma and DPS) | TDM                                                                 | LEV, LTG, ESM, RFM, ZNS, CBZ, linezolid (IS)                                                                | [41]  |

Table 2. Cont.

|            |        |                                                                                         |                                                                                                                                                                                                                                                                                                                                                                  |                                                                                                                                                                                  |                           |                                               |                                                                                                             |       |
|------------|--------|-----------------------------------------------------------------------------------------|------------------------------------------------------------------------------------------------------------------------------------------------------------------------------------------------------------------------------------------------------------------------------------------------------------------------------------------------------------------|----------------------------------------------------------------------------------------------------------------------------------------------------------------------------------|---------------------------|-----------------------------------------------|-------------------------------------------------------------------------------------------------------------|-------|
| Felbamate  | plasma | Protein precipitation with methanol                                                     | UHPLC-MS/MS<br>m/z: 239.2 → 178.2 (FBM), 237.1 → 194.2 (CBZ), 253.2 → 180.2 (CBZE), 301.2 → 259.2 (CLB), 142.0 → 72.0 (ESM), 172.2 → 137.2 (GBP), 256.1 → 211.1 (LTG), 171.1 → 126.1 (LEV), 231.2 → 188.1 (PB), 253.2 → 182.2 (PHT), 219.2 → 162.2 (PRM), 376.2 → 149.1 (TGB), 340.2 → 264.2 (TPM), 143.1 → 143.1 (VPA), 130.1 → 71.2 (VGB), 213.1 → 132.1 (ZNS) | Acquity UPLC BEH C18 (50 mm × 2.1 mm, 1.7 μm)<br>10 mM ammonium acetate with 0.1% formic acid/methanol, gradient mode                                                            | 4.2 mg/L;<br>4.2–105 mg/L | TDM                                           | CBZ, CBZE, CLB, clonazepam, diazepam, ESM, GBP, LTG, LEV, nitrazepam, PB, PHT, PRM, TGB, TPM, VPA, VBG, ZNS | [67]  |
| Gabapentin | serum  | Protein precipitation with acetonitrile                                                 | UHPLC-MS/MS<br>m/z: 172 → 154 (GBP), 182 → 147 (GBP-d10), 256 → 43 (LTG), 261 → 48 (LTG-13C,15N <sub>4</sub> ), 171 → 69 (LEV), 177 → 69 (LEV-d6), 213 → 132 (ZNS), 219 → 138 (ZNS-13C6)                                                                                                                                                                         | ACQUITY UPLC BEH C18 column (30 mm × 2.1 mm, 1.7 μm)<br>2 mM ammonium acetate in water and 2 mM ammonium acetate in methanol, both containing 0.1% formic acid, gradient elution | 0.1 mg/L;<br>0.1–100 mg/L | 10 epileptic patients                         | LTG, LEV, ZNS and monohydroxy derivative of OXC                                                             | [75]  |
| Gabapentin | blood  | Protein precipitation with methanol                                                     | LC-MS/MS<br>m/z: 172.1 → 154.1 (GBP), 160.1 → 142.1 (PGB), 182.2 → 164.2 (GBP-d10), 166.2 → 148.1 (PGB-d6)<br>LC-TOF-MS                                                                                                                                                                                                                                          | Poroshell 120 EC C-18 (100 mm × 2.1 mm, 2.7 μm)<br>water and acetonitrile containing 0.1% formic acid                                                                            | 0.5 mg/L;<br>0.5–50 mg/L  | 1091 blood samples for toxicological analysis | GBP-d10 (IS), PGB, PGB-d6 (IS)                                                                              | [139] |
| Gabapentin | blood  | Protein precipitation with acetonitrile                                                 | LC-MS/MS<br>m/z: 172.1 → 154.0 (GBP), 160.1 → 55.2 (PGB), 182.1 → 164.0 (GBP-d10), 166.2 → 148.1 (PGB-d6)                                                                                                                                                                                                                                                        | Poroshell 120 EC C-18 (100 mm × 2.1 mm, 2.7 μm)<br>water and acetonitrile containing 0.1% formic acid                                                                            | 0.5 mg/L;<br>0.5–50 mg/L  | Blood samples for toxicological analysis      | Baclofen, GBP-d10 (IS), PGB, PGB-d6 (IS)                                                                    | [140] |
| Gabapentin | serum  | LLE with hexanol followed by derivatization with hexyl chloroformate microwave-assisted | GC-MS<br>m/z: 240 (GBP), 228 (PGB), 212 (VGB), 184 (IS)                                                                                                                                                                                                                                                                                                          | HP5-MS (30 m × 0.25 mm, 0.25 μm)<br>Carrier gas: helium                                                                                                                          | 0.5 mg/L;<br>0.5–50 mg/L  | Therapeutic drug or compliance monitoring     | PGB, VGB, 3-(4-chlorophenyl)-propionic acid (IS)                                                            | [141] |
| Gabapentin | DBS    | derivatization with heptafluorobutanol                                                  | GC-MS<br>m/z: 195 (GBP), 205 (GBP-d10)                                                                                                                                                                                                                                                                                                                           | HP5-MS (30 m × 0.25 mm, 0.25 μm)<br>Carrier gas: helium                                                                                                                          | 1 mg/L;<br>1–30 mg/L      | 15 healthy volunteers                         | GBP-d10 (IS)                                                                                                | [142] |

Table 2. Cont.

|             |                                                   |                                                                                                                                                                      |                                                         |                                                                                                                                  |                            |                                                                                       |                                                            |       |
|-------------|---------------------------------------------------|----------------------------------------------------------------------------------------------------------------------------------------------------------------------|---------------------------------------------------------|----------------------------------------------------------------------------------------------------------------------------------|----------------------------|---------------------------------------------------------------------------------------|------------------------------------------------------------|-------|
| Lacosamide  | postmortem whole blood, clinical serum and plasma | LLE with alkaline condition (0.01 M NaOH pH 12) and ethyl acetate                                                                                                    | GC-MS<br>m/z: 91 (LCM), 100 (IS)                        | HP-5 MS UI (30 m × 0.25 mm, 0.25 μm)<br>Carrier gas: helium                                                                      | 0.5 mg/L;<br>2–100 mg/L    | Routine forensic toxicology and therapeutic drug monitoring                           | Moclobemide (IS)                                           | [165] |
| Lacosamide  | plasma                                            | SPE through HF Bond Elut C18 and derivatization using N-methyl-N-tert-butyltrimethylsilyltrifluoroacetamide with 1% tert-butyltrimethylsilylchloride in acetonitrile | GC-MS<br>m/z: 91 (LCM), 132 (IS)                        | DB-5 MS (30 m × 0.25 mm, 0.25 μm)<br>Carrier gas: helium                                                                         | 0.2 mg/L;<br>0.2–20 mg/L   | Therapeutic drug monitoring                                                           | LEV-d6 (IS)                                                | [167] |
| Lacosamide  | serum                                             | Protein precipitation with methanol and SPE-mass spectrometry online                                                                                                 | LC-MS/MS<br>m/z: 251.1 → 108.1 (LCM), 255.1 → 91.0 (IS) | Phenyl SPE cartridge with water containing 10 mM ammonium acetate, 0.1% formic acid and 0.01% trifluoroacetic acid<br>LiCHroCART | 0.05 mg/L;<br>5–50 mg/L    | Therapeutic drug monitoring                                                           | Lacosamide-13C, d3 (IS)                                    | [166] |
| Lacosamide  | plasma                                            | Protein precipitation with methanol and LLE with ethyl acetate                                                                                                       | HPLC-DAD<br>λ=220 nm (LCM, LEV)<br>λ=239 nm (ZNS, IS)   | Purospher Star C18 (55 mm × 4 mm, 3 μm)<br>water/acetonitrile, gradient mode<br>Hypersil BDS C18 (150 mm × 4.6 mm, 5 μm)         | 0.5 mg/L;<br>5–300 mg/L    | Pharmacokinetic studies in human and for therapeutic drug monitoring                  | LEV, ZNS, antipyrine (IS)                                  | [105] |
| Lacosamide  | urine and bulk                                    | Protein precipitation with methanol                                                                                                                                  | UHPLC-DAD<br>λ=205 nm                                   | 0.05 M/L phosphate buffer pH = 6.50/methanol/acetonitrile (80:10:10, v/v/v)<br>RP-18 column (250 mm)                             | 0.093 mg/L;<br>0.1–70 mg/L | Application to pharmaceutical dosage form (tablets) and human urine LCM determination | LEV, catechol (IS)                                         | [103] |
| Lamotrigine | plasma                                            | Deproteinization with 10% acetic acid followed by LLE with diethyl ether:dichloromethane (64:36)                                                                     | HPLC-UV<br>λ=210 nm                                     | acetonitrile and 0.1M potassium dihydrogen phosphate (25:75, v/v)<br>Acclaim C-18 (150 mm × 4.6 mm, 5 μm)                        | 2 mg/L;<br>2–50 mg/L       | 22 epileptic patients                                                                 | Barbital sodium (IS)                                       | [151] |
| Lamotrigine | plasma                                            | Protein precipitation using methanol with 1% acetic acid                                                                                                             | HPLC-UV<br>λ=210 nm                                     | potassium dihydrogen phosphate buffer (50 mM) and methanol (61:39, v/v)                                                          | NA;<br>2.4–120 mg/L        | 186 clinical samples                                                                  | OXC, 10,11-dihydro-10-hydroxycarbazepine, Fluconazole (IS) | [71]  |

Table 2. Cont.

|               |        |                                                               |                                                                                                                        |                                                                                                                                                                                                                                                                                                                                                                                                       |                                |                                                               |                                                                 |       |
|---------------|--------|---------------------------------------------------------------|------------------------------------------------------------------------------------------------------------------------|-------------------------------------------------------------------------------------------------------------------------------------------------------------------------------------------------------------------------------------------------------------------------------------------------------------------------------------------------------------------------------------------------------|--------------------------------|---------------------------------------------------------------|-----------------------------------------------------------------|-------|
| Lamotrigine   | plasma | Protein precipitation with methanol                           | HPLC-UV<br>$\lambda=210$ nm                                                                                            | XBridge C18 (250 mm $\times$ 4.6 mm, 3.5 $\mu$ m acetonitrile and 50 mM/L phosphate buffer at pH = 4.5, gradient elution Diamonsil C <sub>18</sub> (150 mm $\times$ 4.6mm, 5 $\mu$ m) 0.1% trifluoroacetate and methanol (59:41, v/v)                                                                                                                                                                 | 0.6 mg/L;<br>0.6–24 mg/L       | 61 epileptic patients                                         | Linezolid (IS)                                                  | [152] |
| Lamotrigine   | plasma | Protein precipitation with methanol                           | HPLC-UV<br>$\lambda=260$ nm                                                                                            | Capcell Pak C18 (250 mm $\times$ 4.6 mm, 5 $\mu$ m) 0.1% trifluoroacetate and methanol (59:41, v/v)                                                                                                                                                                                                                                                                                                   | 1 mg/L;<br>1–50 mg/L           | 67 patients with epilepsy                                     | Diazepam (IS)                                                   | [153] |
| Lamotrigine   | serum  | LLE with diethyl ether                                        | HPLC-UV<br>$\lambda=220$ nm                                                                                            | Capcell Pak C18 (250 mm $\times$ 4.6 mm, 5 $\mu$ m) acetonitrile and 0.05 M NaH <sub>2</sub> PO <sub>4</sub> (26.5:73.5, v/v, pH = 4.5)                                                                                                                                                                                                                                                               | NA                             | 214 epileptic patients                                        | Chloroxazone (IS)                                               | [154] |
| Lamotrigine   | plasma | Protein precipitation with acetonitrile                       | LC-MS/MS<br>m/z: 256.1 $\rightarrow$ 58.0 (LTG), 237.1 $\rightarrow$ 194.1 (CBZ), 247.2 $\rightarrow$ 204.1 (CBZ-d10)  | XSelect CSH C18 XP (100 mm $\times$ 2.1 mm, 2.5 $\mu$ m) 5 mM ammonium acetate (with 0.1% of formic acid) and acetonitrile, gradient elution Agilent Zorbax SB-C18, (100 mm $\times$ 2.1 mm, 3.5 $\mu$ m) 0.1% formic acid in water with acetonitrile (40:60, v/v), isocratic elution LiChroCART@Purospher®StarC18 (55 mm $\times$ 4 mm, 3 $\mu$ m) water/acetonitrile (90:10, v/v), gradient elution | 0.005 mg/L;<br>0.005–10.5 mg/L | TDM in schizophrenic patients                                 | CBZ, CBZ-d10 (IS), antipsychotics, antidepressants, anxiolytics | [156] |
| Levetiracetam | plasma | Protein precipitation with acetonitrile                       | LC-MS/MS<br>m/z: 171.1 $\rightarrow$ 154.1 (LEV), 172.5 $\rightarrow$ 126.1 (UCB L057), 256.3 $\rightarrow$ 167.3 (IS) | Agilent Zorbax SB-C18, (100 mm $\times$ 2.1 mm, 3.5 $\mu$ m) 0.1% formic acid in water with acetonitrile (40:60, v/v), isocratic elution LiChroCART@Purospher®StarC18 (55 mm $\times$ 4 mm, 3 $\mu$ m) water/acetonitrile (90:10, v/v), gradient elution                                                                                                                                              | 0.5 mg/L;<br>0.5–100 mg/L      | Pharmacokinetic study of LEV in patients with epilepsy        | LEV metabolite (UCB L057), Diphenhydramine (IS)                 | [100] |
| Levetiracetam | plasma | Protein precipitation and LLE with methanol and ethyl acetate | HPLC-DAD<br>$\lambda=220$ nm (LCM, LEV)<br>$\lambda=239$ nm (ZNS, IS)                                                  | Agilent Zorbax SB-C18, (100 mm $\times$ 2.1 mm, 3.5 $\mu$ m) 0.1% formic acid in water with acetonitrile (40:60, v/v), isocratic elution LiChroCART@Purospher®StarC18 (55 mm $\times$ 4 mm, 3 $\mu$ m) water/acetonitrile (90:10, v/v), gradient elution                                                                                                                                              | 2.5 mg/L;<br>2.5–40 mg/L       | Therapeutic drug monitoring in 11 distinct epileptic patients | Antipyrine (IS), LCM, ZNS                                       | [105] |

Table 2. Cont.

|               |                                 |                                                       |                                                                              |                                                                                                                                                                                                      |                                                             |                                                                                                |                            |       |
|---------------|---------------------------------|-------------------------------------------------------|------------------------------------------------------------------------------|------------------------------------------------------------------------------------------------------------------------------------------------------------------------------------------------------|-------------------------------------------------------------|------------------------------------------------------------------------------------------------|----------------------------|-------|
| Levetiracetam | plasma/serum                    | Protein precipitation with methanol                   | HPLC-UV<br>$\lambda=205$ nm                                                  | Venusil XBP C18, (250 mm × 4.6 mm, 5 $\mu$ m)<br>50 mM pH = 5.5 potassium dihydrogen phosphate-acetonitrile (90:10, v/v), isocratic elution<br>LichroCART 250–4.6 RP-18 (250 mm × 4.6 mm, 5 $\mu$ m) | 1 mg/L;<br>1–60 mg/L                                        | Therapeutic drug monitoring in epilepsy patients                                               | Gabapentin (IS)            | [108] |
| Levetiracetam | plasma                          | Protein precipitation with zinc sulphate              | HPLC-UV<br>$\lambda$ (NA)                                                    | 50 mM pH = 4.5 potassium dihydrogen phosphate buffer and acetonitrile/methanol (3/1) (65:35, v/v), isocratic elution<br>Synergi Hydro-RP (150 mm × 4.6 mm, 4 $\mu$ m)                                | 5 mg/L;<br>5–80 mg/L                                        | Therapeutic drug monitoring in epilepsy patients in daily clinical practice                    | NA                         | [109] |
| Levetiracetam | plasma and CRRT effluent sample | Protein precipitation with acetonitrile               | HPLC-UV<br>$\lambda=210$ nm                                                  | 50 mM phosphate buffer and acetonitrile, gradient elution<br>Pre-coated silica gel plate G 60-F <sub>254</sub> (20 cm × 20 cm, 6–8 $\mu$ m)                                                          | 2 mg/L;<br>2–80 mg/L                                        | Therapeutic drug monitoring in patients undergoing continuous renal replacement therapy (CRRT) | Caffeine (IS)              | [110] |
| Oxcarbazepine | plasma                          | SALLE                                                 | HPTLC-UV<br>$\lambda=217$ nm (ESL and OXC)<br>$\lambda=265$ nm (CBZ and OXC) | n-hexane-methylene chloride-ethanol-glacial acetic acid (50:40:10:0.1, v/v/v/v)<br>Acclaim C18 (Thermo, 150 mm × 4.6mm, 5 $\mu$ m)                                                                   | 34.58 ng/spot (6.92 mg/L);<br>85–1000 ng/spot (17–200 mg/L) | Clinical study in epileptic patients and pharmaceutical sample                                 | ESL or CBZ mixture         | [49]  |
| Oxcarbazepine | plasma                          | Protein precipitation by methanol with 1% acetic acid | HPLC-UV<br>$\lambda=210$ nm                                                  | potassium dihydrogen phosphate buffer (50 mM) and methanol (61:39)                                                                                                                                   | 2.4 mg/L;<br>2.4–120 mg/L                                   | Clinical practice                                                                              | LTG, MHD, fluconazole (IS) | [71]  |

Table 2. Cont.

|               |                                      |                                                   |                                                                                                                                                                                                                                                                                                               |                                                                                                                                                                                           |                            |                                                                                               |                                                                                                                 |      |
|---------------|--------------------------------------|---------------------------------------------------|---------------------------------------------------------------------------------------------------------------------------------------------------------------------------------------------------------------------------------------------------------------------------------------------------------------|-------------------------------------------------------------------------------------------------------------------------------------------------------------------------------------------|----------------------------|-----------------------------------------------------------------------------------------------|-----------------------------------------------------------------------------------------------------------------|------|
| Oxcarbazepine | plasma                               | MEPS                                              | HPLC-DAD<br>$\lambda=215, 237, 280$ nm                                                                                                                                                                                                                                                                        | LiChroCART<br>Purospher Star RP<br>acetonitrile<br>(6%)/water-<br>methanol-<br>triethylamine (94%)<br>(73.2:26.5:0.3; v/v/v)<br>Synergi Hydro-RP<br>(50 mm $\times$ 2.0 mm,<br>4 $\mu$ m) | 0.1 mg/L;<br>0.1–5 mg/L;   | Routine TDM of<br>CBZ with, LTG,<br>OXC, PB and PHT                                           | CBZ, LTG, PB, PHT,<br>CBZE, licarbazepine,<br>ketoprofen (IS)                                                   | [65] |
| Oxcarbazepine | plasma                               | Protein precipitation with<br>acetonitrile        | LC-MS/MS<br>m/z: 253.1 $\rightarrow$ 180.2 (OXC),<br>255.1 $\rightarrow$ 194.2 (HOXC)                                                                                                                                                                                                                         | water-formic acid<br>(100/0.1, v/v) and<br>acetonitrile –<br>methanol-formic acid<br>(50/50/0.1, v/v/v)                                                                                   | 0.02 mg/L;<br>0.02–10 mg/L | Clinical study,<br>pharmacokinetic<br>sample assay in<br>order to support a<br>clinical trial | HOXC                                                                                                            | [66] |
| Oxcarbazepine | plasma                               | Protein precipitation with<br>methanol            | UHPLC-MS/MS<br>m/z: 253.1 $\rightarrow$ 179.9 (OXC),<br>255.9 $\rightarrow$ 210.8 (LTG); 254.8 $\rightarrow$<br>193.7 (MHD); 357 $\rightarrow$ 263.7<br>(TPM); 170.9 $\rightarrow$ 125.8 (LVT);<br>173.9 $\rightarrow$ 128.8 (LVT-d3); 369 $\rightarrow$<br>269.9 (TPM-d12) 217.9 $\rightarrow$<br>185.7 (IS) | Waters BEH C18 (50<br>mm $\times$ 2.1 mm;<br>1.7 $\mu$ m)<br>water with 0.1%<br>formic acid/methanol                                                                                      | 0.20 mg/L;<br>0.20–20 mg/L | Clinical<br>application in 259<br>samples from<br>patients treated for<br>epilepsy<br>TDM     | LTG, LVT, TPM, MHD,<br>LVT-d3 (IS), TPM-d12<br>(IS), 3,5-diamino-6-<br>[2methoxyphenyl]-<br>1,2,4-triazine (IS) | [74] |
| Oxcarbazepine | plasma                               | LLE with ethyl acetate                            | SFC-ESI-MS/MS (supercritical<br>fluid chromatography/mass<br>spectrometry<br>m/z: 253.1 $\rightarrow$ 180.1 (OXC)<br>237.2 $\rightarrow$ 194.1 (CBZ), 255.1 $\rightarrow$<br>193.0 (MHD), 338.2 $\rightarrow$ 78.0<br>(TPM), 285.2 $\rightarrow$ 193.1 (IS)                                                   | UPC2TM BEH, 2EP<br>(100 mm $\times$ 3 mm;<br>1.7 $\mu$ m)<br>carbon dioxide<br>and methanol                                                                                               | 0.01 mg/L;<br>0.01–8 mg/L  | TDM,<br>simultaneous<br>quantification of<br>several AED,<br>pharmacokinetics<br>study        | CBZ, TPM, MHD,<br>diazepam (IS)                                                                                 | [54] |
| Piracetam     | plasma                               | Protein precipitation with 20%<br>perchloric acid | HPLC-UV<br>$\lambda = 200$ nm                                                                                                                                                                                                                                                                                 | RP-18 Merck<br>LiChroSpher 100 (250<br>mm $\times$ 4mm, 5 $\mu$ m),<br>gradient mode<br>aqueous solution of<br>0,01% perchloric<br>acid/methanol/aceton<br>itrile                         | 2 mg/L;<br>1–100 mg/L      | Bioequivalence<br>study                                                                       | None                                                                                                            | [88] |
| Piracetam     | plasma and<br>cerebrospinal<br>fluid | Direct sample injection                           | Micellar electrokinetic<br>chromatography (MEKC)<br>Beckman P/ACE MDQ system<br>with UV detection                                                                                                                                                                                                             | Fused capillary (40.2<br>cm $\times$ 50 $\mu$ m)                                                                                                                                          | 1 mg/L;<br>5–500 mg/L      | Application to<br>analyze piracetam<br>in patients with<br>aphasia                            | Imidazole (IS)                                                                                                  | [89] |

Table 2. Cont.

|               |                                  |                                                                                                                                                                            |                                                                                                                                                                                                                                          |                                                                                                                                                |                               |                                                                                               |                                                                     |         |
|---------------|----------------------------------|----------------------------------------------------------------------------------------------------------------------------------------------------------------------------|------------------------------------------------------------------------------------------------------------------------------------------------------------------------------------------------------------------------------------------|------------------------------------------------------------------------------------------------------------------------------------------------|-------------------------------|-----------------------------------------------------------------------------------------------|---------------------------------------------------------------------|---------|
| Piracetam     | serum and urine (tablets, syrup) | Protein precipitation serum with acetonitrile, urine diluted                                                                                                               | HPLC-UV<br>$\lambda=205$ nm                                                                                                                                                                                                              | Hibar Bondapak ODS C18 (250 mm × 4.6 mm, 5 $\mu$ m) trimethylamine in water/acetonitrile (70:30, v/v) with phosphoric acid pH = 6,5            | 0.0093 mg/L;<br>0.02-10 mg/L  | Application to analyze piracetam in human serum and urine (also in bulk drugs)                | LEV                                                                 | [90]    |
| Perampanel    | plasma                           | Deproteinization by acetonitrile                                                                                                                                           | HPLC-FLD<br>$\lambda_{ex}/\lambda_{em} = 290/430$ nm                                                                                                                                                                                     | Phenomenex (100 mm × 4.6 mm, 2.6 $\mu$ m) sodium acetate buffer-acetonitrile (40:60, v/v)                                                      | 0.002 mg/L;<br>0.002-1 mg/L   | Clinical study in 30 patients treated with PER (2-10 mg/d) receiving different AED co-therapy | Mirtazapine (IS)                                                    | [172]   |
| Perampanel    | plasma                           | LLE with diethyl ether                                                                                                                                                     | HPLC-FLD<br>$\lambda_{ex}/\lambda_{em} = 290/430$ nm                                                                                                                                                                                     | YMC pack pro C18 (150 mm × 4.6 mm, 5 $\mu$ m) acetonitrile water-acetic acid-sodium acetate (840:560:3:1.8, v/v/v/w)                           | 0.001 mg/L;<br>0.001-0.5 mg/L | Clinical studies and TDM at laboratories where LC-MS/MS system are not available              | ER-167615 (IS)                                                      | [170]   |
| Perampanel    | DPS                              | LLE with methanol                                                                                                                                                          | HPLC-UV<br>$\lambda=320$ nm                                                                                                                                                                                                              | Reverse-phase monolithic column water-acetonitrile (60:40, v/v) with phosphoric acid                                                           | 0.025 mg/L;<br>0.025-1 mg/L   | TDM                                                                                           | None                                                                | [175]   |
| Perampanel    | serum                            | Acetonitrile stacking for on-line sample pre-concentration                                                                                                                 | CE-FL (Capillary electrophoretic methods with fluorescence detection)<br>$\lambda_{ex}/\lambda_{em} = 240-400/495$ nm                                                                                                                    | Fused-silica capillary Electrolyte-50 mM chloroacetic acid with 0.5% polyvinylalcohol (pH = 2.15)                                              | 0.009 mg/L;<br>0.01-1 mg/L    | TDM and toxicological analysis                                                                | None                                                                | [174]   |
| Phenobarbital | whole blood                      | Fully automated dried blood spot extraction system. Volumetric absorption microsampling (VAMS), extraction with acetonitrile/water (80:20, v/v) with 5 mM ammonium acetate | UHPLC-MS/MS<br>m/z: 231.0 → 187.8 (PHB), 143 → 143 (VPA), 251.1 → 102.2 (PHT), 237 → 194.1 (CBZ), 253.1 → 180 (CBZE), 148.9 → 148.9 (VPA-d6), 236 → 193 (PHB-d5), 261 → 218.1 (PHT-d10), 247 → 204.1 (CBZ-d10), 263.1 → 220.2 (CBZE-d10) | Chromolith reversed phase (RP-18) endcaped (100 mm × 4.6 mm) 5 mM ammonium acetate and 5 mM ammonium acetate in acetonitrile/water (95:5, v/v) | 1.0 mg/L;<br>1.0-160.0 mg/L   | Assessment levels of AEDs in patients                                                         | PHB-d5 (IS), CBZ, CBZ-d10, CBZE, CBZE-d10 VPA, VPA-d6, PHT, PHT-d10 | [21,22] |



Table 2. Cont.

|                             |                     |                                                                                                                                   |                                                                                                                                                                                                                                                                                                                                                                                                                                                                                                                                                                             |                                                                                                                                                  |                                                                                           |                                                       |                                                                                                   |       |
|-----------------------------|---------------------|-----------------------------------------------------------------------------------------------------------------------------------|-----------------------------------------------------------------------------------------------------------------------------------------------------------------------------------------------------------------------------------------------------------------------------------------------------------------------------------------------------------------------------------------------------------------------------------------------------------------------------------------------------------------------------------------------------------------------------|--------------------------------------------------------------------------------------------------------------------------------------------------|-------------------------------------------------------------------------------------------|-------------------------------------------------------|---------------------------------------------------------------------------------------------------|-------|
| Phenobarbital               | plasma              | SPE reversed-phase cartridges (Waters Oasis HLB) washed out by acetonitrile (10 mM ammonium buffer pH 3.5, 2:98 v/v)              | online-SPE-LC-HRMS/MS<br>m/z: 231.08 → 188.08 (PHB), 251.08 → 208.08 (PHT), 237.10 → 194.09 (CBZ), 253.09 → 210.09 (CBZE)<br><br>LC-MS/MS<br>m/z: 231.1 → 231.1 (PHB), 253.1 → 182.1 (PHT), 237.2 → 194.1 (CBZ), 253.0 → 210.0 (CBZE), 256.1 → 43 (LTG), 253.1 → 208.0 (OXC), 255.1 → 194.1 (MHD), 171.1 → 126.1 (LEV), 143.1 → 143.1 (VPA), 338.2 → 78 (TPM)<br><br>LC-ESI-MS/MS<br>m/z: 251.1 → 208.1 (PHT), 237.1 → 194.0 (CBZ), 255.1 → 237 (CBZ-OH), 256 → 211 (LTG), 253.1 → 180.1 (OXC), 171.1 → 126 (LEV), 143.1 → 143.1 (VPA), 338.1 → 78.1 (TPM), 211 → 119 (ZNS) | Zorbax SB-C-18 (250 mm × 4.6 mm, 5 μm) acetonitrile, methanol and 10 mM acetate buffer pH = 5.5 (10:20:70, v/v/v)                                | PHB, PHT<br>0.008 mg/L;<br>0.008–2.5 mg/L                                                 | TDM for epilepsy patients                             | PHT, CBZ, CBZE, LTG (IS)                                                                          | [23]  |
| Phenobarbital               | plasma              | Protein precipitation with acetonitrile                                                                                           | LC-MS/MS<br>m/z: 231.1 → 231.1 (PHB), 253.1 → 182.1 (PHT), 237.2 → 194.1 (CBZ), 253.0 → 210.0 (CBZE), 256.1 → 43 (LTG), 253.1 → 208.0 (OXC), 255.1 → 194.1 (MHD), 171.1 → 126.1 (LEV), 143.1 → 143.1 (VPA), 338.2 → 78 (TPM)<br><br>LC-ESI-MS/MS<br>m/z: 251.1 → 208.1 (PHT), 237.1 → 194.0 (CBZ), 255.1 → 237 (CBZ-OH), 256 → 211 (LTG), 253.1 → 180.1 (OXC), 171.1 → 126 (LEV), 143.1 → 143.1 (VPA), 338.1 → 78.1 (TPM), 211 → 119 (ZNS)                                                                                                                                  | Zorbax SB-C18 (50 mm × 4.6 mm, 2.7 μm) acetonitrile/water                                                                                        | 0.15 mg/L;<br>0.4–60 mg/L                                                                 | TDM for epilepsy patients                             | CBZ and its CBZE, LTG, OXC and 10-hydroxycarbazepine, LEV, PHT, VPA, TPM and diphenhydramine (IS) | [24]  |
| Phenytoin                   | plasma              | Protein precipitation with acetonitrile                                                                                           | LC-MS/MS<br>m/z: 252.98 → 182.1 (PHT), m/z: 253.98 → 104.0 (FOS)                                                                                                                                                                                                                                                                                                                                                                                                                                                                                                            | Phenomenex Kinetic C18 (100 mm × 2.1 mm, 2.6 μm) 5 mM ammonium and acetonitrile with 5 mM ammonium acetate                                       | PHT, ZNS TPM:<br>0.01–10 mg/L<br>VPA 0.05–50 mg/L<br>LEV, LTG, CBZ, CBZE OXC: 5–5000 μg/L | Therapeutic drug monitoring in patients with epilepsy | ZNS, TPM, VPA, LEV, LTG, CBZ, CBZ-OH, OXC                                                         | [30]  |
| Phenytoin                   | whole blood, plasma | DBS extracted of methanol/water (80:20, v/v) and 0.1% formic acid plasma diluted and precipitated methanol/water 0.1% formic acid | LC-MS/MS<br>m/z: 253.2 → 182.2                                                                                                                                                                                                                                                                                                                                                                                                                                                                                                                                              | Synergii Fusion column (50 mm × 2 mm, 4 μm) water/0.1% formic acid and methanol/0.1% formic acid<br><br>Restek Ultra BiPh (50 mm × 2.1 mm, 5 μm) | 1.0 mg/L;<br>0.1–100 mg/L                                                                 | Determination of PHT in paediatric patients           | None                                                                                              | [31]  |
| Phenytoin and phosphenytoin | plasma              | free fraction of phenytoin obtained after ultrafiltration using Milipore protein filter                                           | LC-MS/MS<br>m/z: 252.98 → 182.1 (PHT), m/z: 253.98 → 104.0 (FOS)                                                                                                                                                                                                                                                                                                                                                                                                                                                                                                            | formic acid in water and formic acid in methanol<br><br>TSK-gel ODS-140HTP (50 mm × 2.1 mm, 2.3 μm)                                              | NA;<br>0.1–4 mg/L                                                                         | Measurement of free phenytoin in human plasma         | FOS                                                                                               | [32]  |
| Pregabalin                  | plasma              | Derivatization with 4-fluoro-7-nitrobenzofurazan                                                                                  | HPLC-FLD<br>$\lambda_{ex}/\lambda_{em} = 470/530$ nm                                                                                                                                                                                                                                                                                                                                                                                                                                                                                                                        | acetonitrile, methanol, and 50 mM/L phosphate buffer pH = 2                                                                                      | 0.05 mg/L;<br>0.05–10 mg/L                                                                | 40 patients with pain                                 | Gabapentin (IS)                                                                                   | [143] |

Table 2. Cont.

|            |                  |                                                                                                                                                                    |                                                                                                                                                                                                                                                                |                                                                                                                                                                                                                                        |                                                          |                                                                                                  |                                                                |       |
|------------|------------------|--------------------------------------------------------------------------------------------------------------------------------------------------------------------|----------------------------------------------------------------------------------------------------------------------------------------------------------------------------------------------------------------------------------------------------------------|----------------------------------------------------------------------------------------------------------------------------------------------------------------------------------------------------------------------------------------|----------------------------------------------------------|--------------------------------------------------------------------------------------------------|----------------------------------------------------------------|-------|
| Pregabalin | plasma, DPS, DBS | plasma: oasis mixed-mode cation exchange (MCX) extraction cartridge bed<br>dry blood/plasma spots: LLE with methyl tert-butyl ether and diethyl ether (80/20, v/v) | HPLC-MS/MS<br>m/z: 160.1 → 141.9 (PGB), 164.1 → 145.9 (IS)                                                                                                                                                                                                     | Poroshell 120 EC-C18 methanol, acetonitrile, and 5 mM ammonium formate solution (80/10/10, v/v/v)                                                                                                                                      | Plasma: 0.02–16 mg/L<br>Blood/plasma spots: 0.01–10 mg/L | Bioequivalence study performed in 14 healthy human volunteers after administration of 300 mg PGB | Pregabalin-d4 (IS)                                             | [144] |
| Pregabalin | DPS, DBS         | Derivatization with n-propyl chloroformate in the presence of n-propanol followed by LLE with ethyl acetate                                                        | HPLC-MS/MS<br>m/z: 288.00 → 228.04 (derivatized PGB), 272.03 → 212.00 (derivatized IS)                                                                                                                                                                         | YMC-Pack Octyl column (50 mm × 4.0 mm, 3 μm) acetonitrile and 0.15% formic acid                                                                                                                                                        | DBS: 0.2 mg/L; 0.2–20 mg/L<br>DPS: 0.4 mg/L; 0.4–40 mg/L | 12 epileptic patients                                                                            | 4-aminocyclohexanecarboxylic acid (IS)                         | [145] |
| Primidone  | plasma           | Online extraction with use restricted access carbon nanotubes (RACNTs)                                                                                             | LC-UV<br>λ=210 nm                                                                                                                                                                                                                                              | C18 (250 × 4.6 mm, 5 μm) column in switching system monopotassium phosphate buffer 0.01 M/L, pH = 6.0: acetonitrile:methanol (55:25:20, v/v/v) and water or methanol:water (90:10, v/v). 30 mg of the RACNTs in a column (10 × 4.6 mm) | 0.2 mg/L; 0.2–40 mg/L                                    | TDM of PRM and PHB in patients with mental illness                                               | Hydantoin (IS), PHB, CBZ                                       | [36]  |
| Primidone  | plasma and DPS   | On dried sample spot devices (DSSDs) and plasma extracted with acetonitrile                                                                                        | LC-MS/MS<br>m/z: 219.0 → 119.0 (PRM), 256.0 → 210.9 (LTG), 253.2 → 180.0 (OXC), 171.1 → 154.0 (LEV), 140.0 → 140.0 (ESM), 338.0 → 280.0 (TPM), 210.99 → 147.1 (ZNS), 171.1 → 154.0 (LEV), 251.05 → 108.1 (LCM), 239.0 → 107.1 (RFM), 255.0 → 108.1 (10-OH-OXC) | C18 Hypersil Gold column (50 mm × 2.1 mm, 1.9 μm) water/0.1% formic acid and acetonitrile/0.1% formic acid                                                                                                                             | 0.32 mg/L; 0.7–26.3 mg/L                                 | TDM in 129 undergoing mono and polytherapy for epilepsy                                          | LCM-d3 (IS), LCM, LEV, ESM, ZNS, RFM, LTG, 10-OH-OXC, OXC, TPM | [37]  |

Table 2. Cont.

|            |                                                   |                                                                             |                                                                                                                                                                                                                                                                                                                                                                                                                                                                                                                               |                                                                                                                                                                                                                                                                                                                                         |                                                                                               |                                                                                                                                                                                                           |                                                                |       |
|------------|---------------------------------------------------|-----------------------------------------------------------------------------|-------------------------------------------------------------------------------------------------------------------------------------------------------------------------------------------------------------------------------------------------------------------------------------------------------------------------------------------------------------------------------------------------------------------------------------------------------------------------------------------------------------------------------|-----------------------------------------------------------------------------------------------------------------------------------------------------------------------------------------------------------------------------------------------------------------------------------------------------------------------------------------|-----------------------------------------------------------------------------------------------|-----------------------------------------------------------------------------------------------------------------------------------------------------------------------------------------------------------|----------------------------------------------------------------|-------|
| Rufinamide | brain tissue and plasma from rats                 | Protein precipitation with methanol                                         | HPLC-UV<br>$\lambda=215$ nm                                                                                                                                                                                                                                                                                                                                                                                                                                                                                                   | Phenomenex Kinetex C18 (250 mm $\times$ 4.6 mm, 5 $\mu$ m)<br>10 mM ammonium acetate buffer (pH = 4.7 $\pm$ 0.1, adjusted with glacial acetic acid) and acetonitrile (84.7:15.3, v/v), isocratic elution<br>LiChroCART Purospher Star column C18 (55 mm $\times$ 4 mm, 3 $\mu$ m)<br>water/acetonitrile (82:18, v/v), isocratic elution | 0.0138 mg/L (plasma);<br>105.24 ng/g (brain);<br>0.1–2 mg/L (plasma)<br>300–6000 ng/g (brain) | Pharmacokinetic studies                                                                                                                                                                                   | Piribedil (IS)                                                 | [181] |
| Rufinamide | mouse plasma and tissues (brain, liver, kidney)   | Protein precipitation with acetonitrile and LLE (extracted dichloromethane) | HPLC-UV<br>$\lambda=210$ nm                                                                                                                                                                                                                                                                                                                                                                                                                                                                                                   | Zorbax SB-C18 (100 mm $\times$ 3 mm, 3.5 $\mu$ m)<br>water with 0.5% formic acid/methanol (50:50, v/v)                                                                                                                                                                                                                                  | 0.1 mg/L;<br>0.1–30 mg/L                                                                      | Preliminary pharmacokinetic studies to support non-clinical pharmacokinetic based studies on RFM                                                                                                          | Chloramphenicol (IS)                                           | [178] |
| Rufinamide | human, rat and rabbit plasma                      | Protein precipitation with methanol                                         | LC-MS/MS<br>m/z: 239 $\rightarrow$ 127 (RFM), 251 $\rightarrow$ 108 (IS)                                                                                                                                                                                                                                                                                                                                                                                                                                                      | Phenomenex Gemini C18 (150 mm $\times$ 2.1 mm, 5 $\mu$ m)<br>2 mM ammonium acetate in water/2 mM ammonium acetate in methanol, gradient mode                                                                                                                                                                                            | 0.005 mg/L;<br>0.04–2 mg/L                                                                    | Therapeutic drug monitoring                                                                                                                                                                               | Lacosamide (IS)                                                | [179] |
| Rufinamide | postmortem whole blood, clinical serum and plasma | Protein precipitation with methanol                                         | LC-MS/MS<br>m/z: 237.3 $\rightarrow$ 194.2 (CBZ), 253.1 $\rightarrow$ 236.1 (CBZE), 297.2 $\rightarrow$ 194.1 (ESL), 172.2 $\rightarrow$ 154.2 (GBP), 251.1 $\rightarrow$ 108.1 (LCM), 171.1 $\rightarrow$ 154.0 (LEV), 256.1 $\rightarrow$ 166.0 (LTG), 253.2 $\rightarrow$ 180.1 (OXC), 231.1 $\rightarrow$ 188.2 (PB), 160.2 $\rightarrow$ 142.2 (PGB), 217.2 $\rightarrow$ 159.2 (STP), 376.1 $\rightarrow$ 247.1 (TGB), 143.1 $\rightarrow$ 143.1 (VPA), 130.1 $\rightarrow$ 71.2 (VGB), 211.2 $\rightarrow$ 119.1 (ZNS) | 0.5 mg/L;<br>0.5–50 mg/L                                                                                                                                                                                                                                                                                                                | Routine forensic toxicology and therapeutic drug monitoring                                   | CBZ, CBZE, ESL, OXC, S-licarbazepine, GBP, LCM, LTG, LEV, PGB, PB, PHT and its metabolite, retigabine and metabolite, STP, TPM, TGB, VPA, VGB, ZNS, tolbutamide (IS), 10,11-dihydrocarbamazepine, GBP-d10 | [81]                                                           |       |
| Rufinamide | plasma and DPS                                    | On dried sample spot devices (DSSDs) and plasma extracted with acetonitrile | LC-MS/MS<br>m/z: 239.0 $\rightarrow$ 107.1 (RFM), 256.0 $\rightarrow$ 210.9 (LTG), 253.2 $\rightarrow$ 180.0 (OXC), 171.1 $\rightarrow$ 154.0 (LEV), 140.0 $\rightarrow$ 140.0 (ESM), 338.0 $\rightarrow$ 280.0 (TPM), 210.99 $\rightarrow$ 147.1 (ZNS), 171.1 $\rightarrow$ 154.0 (LEV), 251.05 $\rightarrow$ 108.1 (LCM), 219.0 $\rightarrow$ 119.0 (PRM), 255.0 $\rightarrow$ 108.1 (10-OH-OXC)                                                                                                                            | C18 Hypersil Gold column (50 mm $\times$ 2.1 mm, 1.9 $\mu$ m)<br>water/0.1% formic acid and acetonitrile/0.1% formic acid                                                                                                                                                                                                               | 0.65 mg/L;<br>1.3–42.4 mg/L                                                                   | Therapeutic drug monitoring                                                                                                                                                                               | LCM-d3 (IS), LCM, LEV, ESM, ZNS, PRM, LTG, 10-OH-OXC, OXC, TPM | [37]  |

Table 2. Cont.

|             |                                    |                                                                                                                                                                 |                                                                                                                                                                                                                                                                                                                                           |                                                                                                                                                           |                              |                                                                                                        |                                                                                                                                                                                                                               |       |
|-------------|------------------------------------|-----------------------------------------------------------------------------------------------------------------------------------------------------------------|-------------------------------------------------------------------------------------------------------------------------------------------------------------------------------------------------------------------------------------------------------------------------------------------------------------------------------------------|-----------------------------------------------------------------------------------------------------------------------------------------------------------|------------------------------|--------------------------------------------------------------------------------------------------------|-------------------------------------------------------------------------------------------------------------------------------------------------------------------------------------------------------------------------------|-------|
| Rufinamide  | plasma and DPS                     | Methanol protein precipitation                                                                                                                                  | HPLC-UV<br>$\lambda=210$ nm                                                                                                                                                                                                                                                                                                               | Column Xbridge C18 (250 mm × 4.6 mm, 3.5 $\mu$ m)<br>Acetonitrile and 50 mM phosphate buffer at pH = 4.5<br>Inertsil® ODS-80A (10 mm × 4.6 mm, 5 $\mu$ m) | 9.6 mg/L;<br>9.6–192 mg/L    | TDM–epilepsy patients undergoing mono- or polytherapy                                                  | Linezolid (IS), LEV, LTC, FBM, ZNS and CBZ-OH                                                                                                                                                                                 | [41]  |
| Stiripentol | plasma                             | Protein precipitation with acetonitrile                                                                                                                         | HPLC-FLD<br>$\lambda_{ex}/\lambda_{em} = 200/400$ nm                                                                                                                                                                                                                                                                                      | 25 mM phosphate buffer (pH = 2.6) and acetonitrile (43:57, v/v)                                                                                           | 0.05 mg/L;<br>0.05–40 mg/L   | 37 patients with Dravet syndrome                                                                       | None                                                                                                                                                                                                                          | [184] |
| Sulthiame   | whole blood, plasma, urine         | Protein precipitation with methanol (plasma) hemolyzed whole blood, or hemolyzed red blood cells urine was vortexed, sonicated and after centrifugation diluted | LC-MS/MS<br>m/z: 289.0 → 225.1                                                                                                                                                                                                                                                                                                            | XSelect HSS T3 water/acetonitrile                                                                                                                         | 0.01 mg/L;<br>0.1–50 mg/L    | Oral doses of 50, 100, and 200 mg of sulthiame tablets were administered healthy adult male volunteers | sulthiame-d4 (IS)                                                                                                                                                                                                             | [42]  |
| Tiagabine   | postmortem blood, serum and plasma | Protein precipitation with methanol                                                                                                                             | LC-MS/MS<br>m/z: 237.3 → 194.2 (CBZ), 253.1 → 236.1 (CBZE), 297.2 → 194.1 (ESL), 172.2 → 154.2 (GBP), 251.1 → 108.1 (LCM), 171.1 → 154.0 (LEV), 256.1 → 166.0 (LTC), 253.2 → 180.1 (OXC), 231.1 → 188.2 (PB), 160.2 → 142.2 (PGB), 217.2 → 159.2 (STP), 376.1 → 247.1 (TGB), 143.1 → 143.1 (VPA), 130.1 → 71.2 (VGB), 211.2 → 119.1 (ZNS) | Phenomenex Gemini C18 (150 mm × 2.1 mm; 5 $\mu$ m)<br>2 mM ammonium acetate in water/2 mM ammonium acetate in methanol                                    | 0.05 mg/L;<br>0.05–10.0 mg/L | Forensic and toxicological analysis, TDM                                                               | CBZ, CBZE, ESL, OXC, S-licarbazepine, GBP, LCM, LTC, LEV, PGB, PHB, PHT and its metabolite 5-(p-hydroxyphenyl)-5-phenylhydantoin, retigabine (ezogabine) and its metabolite N-acetyl retigabine, RFM, STP, TPM, VPA, VGB, ZNS | [81]  |
| Topiramate  | plasma                             | LLE using dichloromethane and derivatization with 4-chlor-7-nitrobenzo-furazan                                                                                  | LC-FLD<br>$\lambda_{ex}/\lambda_{em} = 475/530$ nm                                                                                                                                                                                                                                                                                        | Reversed phase column Eclipse18 (150 mm × 4.6 mm, 5 $\mu$ m)<br>0.05 M potassium phosphate buffer, pH = 5.5 and acetonitrile (61.5/38.5, v/v)             | 0.01 mg/L;<br>0.01–24 mg/L   | Therapeutic drug monitoring in 27 patients with epilepsy                                               | bendroflumethiazide (IS)                                                                                                                                                                                                      | [114] |

**Table 1. Cont.**

|               |                     |                                                                                                                        |                                                                                                                           |                                                                                                                               |                                                                                                                                                                                 |                                                                                                                |                                                                                                                                                           |       |
|---------------|---------------------|------------------------------------------------------------------------------------------------------------------------|---------------------------------------------------------------------------------------------------------------------------|-------------------------------------------------------------------------------------------------------------------------------|---------------------------------------------------------------------------------------------------------------------------------------------------------------------------------|----------------------------------------------------------------------------------------------------------------|-----------------------------------------------------------------------------------------------------------------------------------------------------------|-------|
| Topiramate    | plasma              | LLE with ethyl acetate and diethylether (95:5, v/v)                                                                    | UHPLC-MS/MS<br>m/z: 338.1 → 77.9 (TPM), 298.1 → 77.9 (M1, M2), 354.1 → 77.9 (M3, M4), 350.1 → 77.9 (IS)                   | Kinetex C-18 (50 mm × 2.1 mm, 2.6 μm)<br>water and methanol                                                                   | TPM 0.1–20 mg/L<br>TPM metabolites: 2,3-desisopropylidene TPM (M1) 0.01–2 mg/L<br>4,5-desisopropylidene TPM (M2), 10-OH TPM (M3) and 9-OH TPM (4) M2, M3, and M4 0.001–0.2 mg/L | 10 samples from patients with epilepsy                                                                         | TPM-d12 (IS) and TPM metabolites: M1, M2, M3 and M4                                                                                                       | [115] |
| Topiramate    | plasma, whole blood | LLE of 8mm DBS with ethyl acetate followed by flash methylation with TMAH (trimethylanilinium hydroxide solution)      | GC-MS<br>m/z: 171, 229, 352                                                                                               | DB-5 MS (30 m and 0.25 μm)                                                                                                    | 0.5 mg/L;<br>0.5–30 mg/L                                                                                                                                                        | Adult volunteer (Hct=44%) after a single oral dose of 100 mg                                                   | 5-(p-methylphenyl)-5-phenyl-hydantoin (IS)                                                                                                                | [116] |
| Topiramate    | plasma              | Protein precipitation with acetonitrile                                                                                | LC-MS/MS<br>m/z: 338.3 → 77.9 (TPM), 150.0 → 91.0 (phentermine), 452.1 → 344.3 (doxazosin), 355.0 → 41.9 (pioglitazone)   | 60–5CN (100 mm × 2.1 mm, 5 μm)<br>acetonitrile/20 mM ammonium formate with 0.3% formic acid (40:60, v/v)                      | 1 μg/L;<br>NA                                                                                                                                                                   | 12 healthy male volunteers after single oral dose phentermine and TPM (7.5/46 mg) in extended release capsules | Phentermine, pioglitazone (IS) and doxazosin (IS)                                                                                                         | [117] |
| Topiramate    | plasma              | Plasma samples buffered with a TRIS buffer at a pH 8.2 and LLE with methyl terc-butyl ether                            | Capillary electrophoresis with capacitively-coupled contactless conductivity detection (CE-C4D), separation voltage 20 kV | Background electrolyte (BGE) composed of 15 mM triethylamine pH = 11.3, hydrodynamic injections by pressure (0.8 psi for 5 s) | 1.0 mg/L;<br>1–30 mg/L                                                                                                                                                          | Plasma samples from hospital patients under treatment with TPM                                                 | IS-2-naphtol, PHT, CBZ, LTC, PHB LEV, GBP, OXC, VPA, clonazepam, CLB, diazepam, fluoxetine, omeprazole, venlafaxine, folic acid, captopril and diclofenac | [118] |
| Valproic acid | plasma              | Protein precipitation with trifluoroacetic acid (TCA) followed by liquid-liquid microextraction (LLME) with chloroform | GC-FID                                                                                                                    | HP-5 (30 m × 0.32 mm, 0.25 μm)<br>Carrier gas: nitrogen                                                                       | 0.2 mg/L;<br>0.2–100 mg/L                                                                                                                                                       | 70 epileptic patients (1–18 years)                                                                             | 3-heptanone (metabolite)                                                                                                                                  | [127] |
| Valproic acid | plasma              | Protein precipitation with acetonitrile followed by dispersive liquid-liquid microextraction (DLLME) with chloroform   | GC-FID                                                                                                                    | HP-5 (30 m × 0.32 mm, 0.25 μm)<br>Carrier gas: nitrogen                                                                       | 6 mg/L;<br>6 - 140 mg/L                                                                                                                                                         | One epileptic patient treated with 125 mg valproic acid                                                        | None                                                                                                                                                      | [128] |

**Table 2. Cont.**

|                            |                                            |                                                                                                              |                                                                                                                                       |                                                                                                                                                                                                                                                                        |                                   |                                                                                                 |                                                                |       |
|----------------------------|--------------------------------------------|--------------------------------------------------------------------------------------------------------------|---------------------------------------------------------------------------------------------------------------------------------------|------------------------------------------------------------------------------------------------------------------------------------------------------------------------------------------------------------------------------------------------------------------------|-----------------------------------|-------------------------------------------------------------------------------------------------|----------------------------------------------------------------|-------|
| Valproic acid              | plasma                                     | LLE with chloroform                                                                                          | GC-FID                                                                                                                                | Gs-BP 100% dimethylpolysiloxane (10 m × 0.53 mm, 2.65 μm)                                                                                                                                                                                                              | 5 mg/L;<br>5–320 mg/L             | 50 epileptic patients                                                                           | Octanoic acid (IS)                                             | [129] |
| Valproic acid              | plasma                                     | LLE using n-hexane                                                                                           | HPLC-UV<br>λ=210 nm                                                                                                                   | Carrier gas: helium<br>C-8 Symmetry (150 mm × 3.9 mm, 5 μm)<br>40 mM sodium dihydrogen phosphate pH = 3.5 and acetonitrile (56:44, v/v)<br>Chromolith RP 18e (100 mm × 4.6 mm)<br>acetonitrile and 0.05 M potassium dihydrogen ortho phosphate (pH = 3.0) (45:55, v/v) | 2 mg/L;<br>2–200 mg/L             | Pharmacokinetic study of one healthy subject after administration of 500mg extended release VPA | Nonanoic acid (IS)                                             | [130] |
| Valproic acid              | saliva, serum                              | Protein precipitation with acetonitrile                                                                      | HPLC-UV<br>λ=210 nm                                                                                                                   | Poroshell SB-C18 column (50 mm × 4.6 mm, 2.7 μm)<br>water-acetonitrile                                                                                                                                                                                                 | NA;<br>5–100 mg/L                 | 65 epileptic patients (9–62 years)                                                              | None                                                           | [131] |
| Valproic acid              | plasma                                     | SPE                                                                                                          | HPLC-MS/MS<br>m/z: 143.0 → 143.0 (VPA),<br>140.9 → 140.9 (2-ene-VPA, 4-ene-VPA),<br>283.9 → 239.9 (IS)                                | RHD EC-C18 column (75 mm × 2.1 mm, 1.8 μm)<br>acetonitrile and 10 mM ammonium acetate<br>Zorbax Eclipse AAA (150 mm × 4.6 mm, 3.5 μm)                                                                                                                                  | NA;<br>20–125 mg/L                | 60 epileptic patients (mean age 30 years old) treated with valproic acid 500 mg twice daily     | VPA metabolites: 2-ene and 4-ene VPA; Probenecid (IS)          | [132] |
| Valproic acid              | serum                                      | SPE                                                                                                          | UHPLC-MS/MS<br>m/z: 143.0 → 143.0 (VPA),<br>141.0 → 141.0 (2-ene-VPA, 4-ene-VPA), 138.8 → 138.8 (2,4-diene-VPA),<br>136.6 → 92.5 (IS) | methanol and 10 mM potassium phosphate dibasic pH = 6.5, gradient elution                                                                                                                                                                                              | NA;<br>1–200 mg/L                 | 170 epileptic patients                                                                          | VPA metabolites: 4-ene-VPA, 2,4-diene-VPA; Salicylic acid (IS) | [133] |
| Vigabatrin                 | human plasma, rat plasma, brain and retina | Protein precipitation with acetonitrile followed by derivatization with naphthalene 2,3-dicarboxaldehyde     | HPLC-FLD<br>λ <sub>ex</sub> /λ <sub>em</sub> = 400/500 nm                                                                             | Kinetex EVO C-18 (100 mm × 2.1 mm, 1.7 μm)<br>5mM ammonium acetate and methanol:acetonitrile (63:37, v/v)                                                                                                                                                              | 0.0646 mg/L;<br>0.0646–6.458 mg/L | Animal study after VGB intraperitoneal administration                                           | GABA, taurine, gabapentin (IS)                                 | [148] |
| (-)-R and (+)-S Vigabatrin | plasma                                     | Protein precipitation with methanol followed by derivatization with o-phthalaldehyde and N-acetyl-L-cysteine | UHPLC-MS/MS<br>m/z: 391.1 → 149.7 (VGB),<br>397.1 → 268.0 (IS)                                                                        |                                                                                                                                                                                                                                                                        | NA;<br>0.2–50 mg/L                | 29 children with West syndrome                                                                  | Deuterated vigabatrin                                          | [149] |

**Table 2. Cont.**

|            |        |                                                                                                                                                                                                                                                                          |                                                                                                                                                                                                         |                                                                                                                                                                             |                           |                                              |                              |       |
|------------|--------|--------------------------------------------------------------------------------------------------------------------------------------------------------------------------------------------------------------------------------------------------------------------------|---------------------------------------------------------------------------------------------------------------------------------------------------------------------------------------------------------|-----------------------------------------------------------------------------------------------------------------------------------------------------------------------------|---------------------------|----------------------------------------------|------------------------------|-------|
| Zonisamide | plasma | Protein precipitation with acetonitrile and then MEPS                                                                                                                                                                                                                    | HPLC-UV<br>$\lambda=240$ nm                                                                                                                                                                             | Acclaim RP 120 C18 (150 mm × 4.6 mm; 5 $\mu$ m)<br>acetonitrile-water (35:65, v/v)                                                                                          | 0.2 mg/L;<br>0.2–80 mg/L  | TDM in clinical practice                     | None                         | [158] |
| Zonisamide | plasma | Protein precipitation with methanol and LLE with ethyl acetate                                                                                                                                                                                                           | HPLC-DAD<br>$\lambda=220$ nm (LCM, LEV)<br>$\lambda=239$ nm (ZNS, IS)                                                                                                                                   | LiChroCART®Purospher®StarC18 (55 mm × 4 mm, 3 $\mu$ m)<br>water/acetonitrile (90:10, v/v),<br>gradient elution<br>ACQUITY UPLC BEH C18 column (30 mm × 2.1 mm, 1.7 $\mu$ m) | 0.5 mg/L;<br>5–300 mg/L   | Pharmacokinetic studies in human and for TDM | LEV, LCM, antipyrine (IS)    | [105] |
| Zonisamide | serum  | Protein precipitation with methanol                                                                                                                                                                                                                                      | UHPLC-MS/MS<br>m/z: 172 → 154 (GBP), 182 → 147 (GBP-d10), 256 → 43 (LTG),<br>261 → 48 (LTG-13C,15N <sub>4</sub> ),<br>171 → 69 (LEV),<br>177 → 69 (LEV-d6),<br>213 → 132 (ZNS),<br>219 → 138 (ZNS-13C6) | 2 mM ammonium acetate in water and<br>2 mM ammonium acetate in methanol,<br>both containing 0.1% formic acid,<br>gradient elution                                           | 0.1 mg/L;<br>0.1–100 mg/L | 10 epileptic patients                        | LTG, LEV, ZNS and MHD of OXC | [75]  |
| Zonisamide | plasma | Reaction with 4-chloro-7-nitrobenzofurazan (NBD-Cl) chemosensor (0.2 M, pH 8 borate buffer with 0.2% methanolic NBD-Cl solution heated at 70°C in a water bath for 20 min, after cooling in ice bath, 0.2 M HCl, extracted by mixture of acetonitrile and methanol (1:1) | HPLC-FLD<br>$\lambda_{ex}/\lambda_{em} = 465/550$ nm                                                                                                                                                    | Zorbax RP-C18 (100 mm × 4.6 mm, 3.5 $\mu$ m)<br>acetonitrile:methanol :water (pH adjusted to 5 with 0.2 M phosphoric acid) (30:20:50% v/v)                                  | 0.086 mg/L;<br>0.1–3 mg/L | Therapeutic drug monitoring                  | TPM, sulpiride (IS)          | [160] |

## References

1. XCOPRI. Full Prescribing Information. Available online: [https://www.accessdata.fda.gov/drugsatfda\\_docs/label/2019/212839s0001bl.pdf](https://www.accessdata.fda.gov/drugsatfda_docs/label/2019/212839s0001bl.pdf) (accessed on 13 July 2020).
2. Cenobamate (XCOPRI). Clinical Pharmacology and Biopharmaceutics Review(s); Application Number 212839Orig1s000. Available online: [https://www.accessdata.fda.gov/drugsatfda\\_docs/nda/2019/212839Orig1s000ClinPharmR.pdf](https://www.accessdata.fda.gov/drugsatfda_docs/nda/2019/212839Orig1s000ClinPharmR.pdf) (accessed on 13 July 2020).
3. Cusumano, J.A.; Klinker, K.P.; Huttner, A.; Luther, M.K.; Roberts, J.A.; LaPlante, K.L. Towards precision medicine: Therapeutic drug monitoring-guided dosing of vancomycin and  $\beta$ -lactam antibiotics to maximize effectiveness and minimize toxicity. *Am. J. Health Syst. Pharm.* **2020**, *77*, 1104–1112, doi:10.1093/ajhp/zxaa128.
4. Reimers, A.; Berg, J.A.; Larsen Burns, M.; Brodtkorb, E.; Johannessen, S.I.; Johannessen Landmark, C. Reference ranges for antiepileptic drugs revisited: A practical approach to establish national guidelines. *DDDT* **2018**, *12*, 271–280, doi:10.2147/DDDT.S154388.

5. Johannessen Landmark, C.; Johannessen, S.I.; Patsalos, P.N. Therapeutic drug monitoring of antiepileptic drugs: Current status and future prospects. *Expert Opin. Drug Metab. Toxicol.* **2020**, *16*, 227–238, doi:10.1080/17425255.2020.1724956.
6. Serragui, S.; Lachhab, Z.; Soussi Tanani, D.; Cherrah, Y. Therapeutic Drug Monitoring of Antiepileptic Drugs: Indications and Modalities. *J. Pharm. Pharmacol. Res.* **2019**, *3*, 41–50, doi:10.26502/jppr.0019.
7. Knezevic, C.E.; Marzinke, M.A. Clinical Use and Monitoring of Antiepileptic Drugs. *J. Appl. Lab. Med.* **2018**, *3*, 115–127, doi:10.1373/jalm.2017.023689.
8. Perucca, E.; French, J.; Bialer, M. Development of new antiepileptic drugs: Challenges, incentives, and recent advances. *Lancet Neurol.* **2007**, *6*, 793–804, doi:10.1016/S1474-4422(07)70215-6.
9. Reeves, D.; Lovering, A.; Thomson, A. Therapeutic drug monitoring in the past 40 years of the Journal of Antimicrobial Chemotherapy. *J. Antimicrob. Chemother.* **2016**, *71*, 3330–3332, doi:10.1093/jac/dkw408.
10. Patsalos, P.N.; Berry, D.J.; Bourgeois, B.F.D.; Cloyd, J.C.; Glauser, T.A.; Johannessen, S.I.; Leppik, I.E.; Tomson, T.; Perucca, E. Antiepileptic drugs best practice guidelines for therapeutic drug monitoring: A position paper by the subcommission on therapeutic drug monitoring, ILAE Commission on Therapeutic Strategies. *Epilepsia* **2008**, *49*, 1239–1276, doi:10.1111/j.1528-1167.2008.01561.x.
11. European Medicines Agency Guideline on Bioanalytical Method Validation. Available online: [https://www.ema.europa.eu/en/documents/scientific-guideline/guideline-bioanalytical-method-validation\\_en.pdf](https://www.ema.europa.eu/en/documents/scientific-guideline/guideline-bioanalytical-method-validation_en.pdf) (accessed on 16 August 2020).
12. U.S. Department of Health and Human Services Food and Drug Administration. Center for Drug Evaluation and Research (CDER) Center for Veterinary Medicine (CVM) Bioanalytical Method Validation. Guidance for Industry. Available online: <https://www.fda.gov/files/drugs/published/Bioanalytical-Method-Validation-Guidance-for-Industry.pdf> (accessed on 16 August 2020).
13. Ilangaratne, N.B.; Mannakkara, N.N.; Bell, G.S.; Sander, J.W. Phenobarbital: Missing in action. *Bull. World Health Organ.* **2012**, *90*, 871–871A, doi:10.2471/BLT.12.113183.
14. Oztekin, O.; Kalay, S.; Tezel, G.; Akcakus, M.; Oygur, N. Can we safely administer the recommended dose of phenobarbital in very low birth weight infants? *Childs Nerv. Syst.* **2013**, *29*, 1353–1357, doi:10.1007/s00381-013-2094-8.
15. Pacifici, M.G. Clinical Pharmacology of Phenobarbital in Neonates: Effects, Metabolism and Pharmacokinetics. *Curr. Pediatric Rev.* **2016**, *12*, 48–54, doi:10.2174/1573397111666151026223914.
16. Pokorná, P.; Šíma, M.; Vobruba, V.; Tibboel, D.; Slanař, O. Phenobarbital pharmacokinetics in neonates and infants during extracorporeal membrane oxygenation. *Perfusion* **2018**, *33*, 80–86, doi:10.1177/0267659118766444.
17. Asadi-Pooya, A.A.; Attar, A.; Moghadami, M.; Karimzadeh, I. Management of COVID-19 in people with epilepsy: Drug considerations. *Neurol. Sci.* **2020**, *41*, 2005–2011, doi:10.1007/s10072-020-04549-5.
18. Alick, S.; Doyle, A. Choosing Antiepileptic Drugs. Available online: <https://practicalneurology.com/articles/2018-oct/choosing-antiepileptic-drugs?c4src=top5> (accessed on 20 August 2020).
19. Amiri Pebdani, A.; Dadfarnia, S.; Haji Shabani, A.M.; Khodadoust, S.; Talebianpoor, M.S. Modified dispersive liquid-phase microextraction based on sequential injection solidified floating organic drop combined with HPLC for the determination of phenobarbital and phenytoin. *J. Sep. Sci.* **2018**, *41*, 509–517, doi:10.1002/jssc.201701111.
20. Min, K.L.; Ryu, J.Y.; Chang, M.J. Development and clinical applications of the dried blood spot method for therapeutic drug monitoring of anti-epileptic drugs. *Basic Clin. Pharm. Toxicol.* **2019**, *125*, 215–236, doi:10.1111/bcpt.13269.
21. Velghe, S.; Deprez, S.; Stove, C.P. Fully automated therapeutic drug monitoring of anti-epileptic drugs making use of dried blood spots. *J. Chromatogr. A* **2019**, *1601*, 95–103, doi:10.1016/j.chroma.2019.06.022.
22. Velghe, S.; Stove, C.P. Volumetric absorptive microsampling as an alternative tool for therapeutic drug monitoring of first-generation anti-epileptic drugs. *Anal. Bioanal. Chem.* **2018**, *410*, 2331–2341, doi:10.1007/s00216-018-0866-4.



23. Qu, L.; Fan, Y.; Wang, W.; Ma, K.; Yin, Z. Development, validation and clinical application of an online-SPE-LC-HRMS/MS for simultaneous quantification of phenobarbital, phenytoin, carbamazepine, and its active metabolite carbamazepine 10,11-epoxide. *Talanta* **2016**, *158*, 77–88, doi:10.1016/j.talanta.2016.05.036.
24. Yin, L.; Wang, T.; Shi, M.; Zhang, Y.; Zhao, X.; Yang, Y.; Gu, J. Simultaneous determination of ten antiepileptic drugs in human plasma by liquid chromatography and tandem mass spectrometry with positive/negative ion-switching electrospray ionization and its application in therapeutic drug monitoring: Sample Preparation. *J. Sep. Sci.* **2016**, *39*, 964–972, doi:10.1002/jssc.201501067.
25. Noval, M.; Seung, H.; Armahizer, M. Evaluation of Fosphenytoin Therapeutic Drug Monitoring in the Neurocritical Care Unit. *Drugs R&D* **2020**, *20*, 17–22, doi:10.1007/s40268-019-00292-1.
26. Vossler, D.G.; Weingarten, M.; Gidal, B.E. The American Epilepsy Society Treatments Committee Summary of Antiepileptic Drugs Available in the United States of America. *Epilepsy Curr.* **2018**, *18*, 1–26, doi:10.5698/1535-7597.18.4s1.1.
27. Sills, G.J.; Rogawski, M.A. Mechanisms of action of currently used antiseizure drugs. *Neuropharmacology* **2020**, *168*, 107966, doi:10.1016/j.neuropharm.2020.107966.
28. Kang, J.; Park, Y.-S.; Kim, S.-H.; Kim, S.-H.; Jun, M.-Y. Modern Methods for Analysis of Antiepileptic Drugs in the Biological Fluids for Pharmacokinetics, Bioequivalence and Therapeutic Drug Monitoring. *Korean J. Physiol. Pharm.* **2011**, *15*, 67, doi:10.4196/kjpp.2011.15.2.67.
29. Marvanova, M. Pharmacokinetic characteristics of antiepileptic drugs (AEDs). *Ment. Health Clin.* **2016**, *6*, 8–20, doi:10.9740/mhc.2015.01.008.
30. Liu, T.; Kotha, R.R.; Jones, J.W.; Polli, J.E.; Kane, M.A. Fast liquid chromatography-tandem mass spectrometry method for simultaneous determination of eight antiepileptic drugs and an active metabolite in human plasma using polarity switching and timed selected reaction monitoring. *J. Pharm. Biomed. Anal.* **2019**, *176*, 112816, doi:10.1016/j.jpba.2019.112816.
31. Villanelli, F.; Giocaliere, E.; Malvagia, S.; Rosati, A.; Forni, G.; Funghini, S.; Shokry, E.; Ombrone, D.; Della Bona, M.L.; Guerrini, R.; et al. Dried blood spot assay for the quantification of phenytoin using Liquid Chromatography-Mass Spectrometry. *Clin. Chim. Acta* **2015**, *440*, 31–35, doi:10.1016/j.cca.2014.11.007.
32. Peat, J.; Frazee, C.; Garg, U. Quantification of Free Phenytoin by Liquid Chromatography Tandem Mass Spectrometry (LC/MS/MS). In *Clinical Applications of Mass Spectrometry in Drug Analysis; Methods in Molecular Biology*; Garg, U., Ed.; Humana Press, New York NY, USA, 2016; Volume 1383, pp. 241–246, ISBN 978-1-4939-3251-1.
33. Ochoa, J. What is the Role of Primidone in the Treatment of Epilepsy? Available online: <https://www.medscape.com/answers/1187334-187110/what-is-the-role-of-primidone-in-the-treatment-of-epilepsy> (accessed on 21 August 2020).
34. May, T.W.; Helmer, R.; Bien, C.G.; Brandt, C. Influence of Dose and Antiepileptic Comedication on Lacosamide Serum Concentrations in Patients With Epilepsy of Different Ages. *Ther. Drug Monit.* **2018**, *40*, 620–627, doi:10.1097/FTD.0000000000000538.
35. Hagemann, A.; Klimpel, D.; Bien, C.G.; Brandt, C.; May, T.W. Influence of dose and antiepileptic comedication on brivaracetam serum concentrations in patients with epilepsy. *Epilepsia* **2020**, *61*, doi:10.1111/epi.16500.
36. dos Santos, R.C.; Kakazu, A.K.; Santos, M.G.; Belinelli Silva, F.A.; Figueiredo, E.C. Characterization and application of restricted access carbon nanotubes in online extraction of anticonvulsant drugs from plasma samples followed by liquid chromatography analysis. *J. Chromatogr. B* **2017**, *1054*, 50–56, doi:10.1016/j.jchromb.2017.02.025.
37. D'Urso, A.; Cangemi, G.; Barco, S.; Striano, P.; D'Avolio, A.; de Grazia, U. LC-MS/MS-Based Quantification of 9 Antiepileptic Drugs From a Dried Sample Spot Device. *Ther. Drug Monit.* **2019**, *41*, 331–339, doi:10.1097/FTD.0000000000000600.
38. Patsalos, P.N.; Spencer, E.P.; Berry, D.J. Therapeutic Drug Monitoring of Antiepileptic Drugs in Epilepsy: A 2018 Update. *Ther. Drug Monit.* **2018**, *40*, 526–548, doi:10.1097/FTD.0000000000000546.
39. Hanrahan, B.; Carson, R. Ethosuximide. Available online: <https://www.ncbi.nlm.nih.gov/books/NBK544244/> (accessed on 21 August 2020).
40. Wu, Y.-J.; Li, Y.-S.; Tseng, W.-L.; Lu, C.-Y. Microextraction combined with microderivatization for drug monitoring and protein modification analysis from limited blood volume using mass spectrometry. *Anal. Bioanal. Chem.* **2018**, *410*, 7405–7414, doi:10.1007/s00216-018-1349-3.

41. Baldelli, S.; Cattaneo, D.; Giodini, L.; Baietto, L.; Di Perri, G.; D'Avolio, A.; Clementi, E. Development and validation of a HPLC-UV method for the quantification of antiepileptic drugs in dried plasma spots. *Clin. Chem. Lab. Med.* **2015**, *53*, doi:10.1515/cclm-2014-0472.
42. Dao, K.; Thoueille, P.; Decosterd, L.A.; Mercier, T.; Guidi, M.; Bardinet, C.; Lebon, S.; Choong, E.; Castang, A.; Guittet, C.; et al. Sultiame pharmacokinetic profile in plasma and erythrocytes after single oral doses: A pilot study in healthy volunteers. *Pharm. Res Perspect* **2020**, *8*, doi:10.1002/prp2.558.
43. Aledo-Serrano, A.; Gil-Nagel, A. Anticonvulsant Agents: Carbamazepine, Oxcarbazepine, and Eslicarbazepine Acetate. In *NeuroPsychopharmacotherapy*; Riederer, P., Laux, G., Mulsant, B., Le, W., Nagatsu, T., Eds.; Springer International Publishing: Cham, Switzerland, 2020; pp. 1–8, ISBN 978-3-319-56015-1.
44. Greenwood, J.; Valdes, J. Perampanel (Fycompa): A Review of Clinical Efficacy and Safety in Epilepsy. *P T* **2016**, *41*, 683–698.
45. Jacob, S.; Nair, A.B. An Updated Overview on Therapeutic Drug Monitoring of Recent Antiepileptic Drugs. *Drugs R&D* **2016**, *16*, 303–316, doi:10.1007/s40268-016-0148-6.
46. Bahmaei, M.; Khalilian, F.; Mashayekhi, H.A. Determination of Carbamazepine in Biological Samples Using Ultrasound-Assisted Emulsification Micro-extraction and Gas Chromatography. *J. Chem. Health Risks* **2015**, *5*, doi:10.22034/jchr.2018.544093.
47. Samadi, A.; Khoubnasabjafari, M.; Barzegar, M.; Sadeghvand, S.; Shiva, S.; Jouyban, A. Simultaneous Determination of Phenobarbital, Phenytoin, Carbamazepine and Carbamazepine-10,11-epoxide in Plasma of Epileptic Patients. *Pharm. Sci.* **2019**, *25*, 345–351, doi:10.15171/PS.2019.43.
48. Ezzeldin, E.; Shahat, A.A.; Basudan, O.A. Development and Validation of an HPLC Method for the Determination of Carbamazepine in Human Plasma. *Life Sci. J.* **2013**, *10*, 2159–2163.
49. Mohamed, F.A.; Ali, M.F.B.; Rageh, A.H.; Mostafa, A.M. A highly sensitive HPTLC method for estimation of oxcarbazepine in two binary mixtures with two metabolically related antiepileptic drugs: Application to pharmaceutical and biological samples. *Microchem. J.* **2019**, *146*, 414–422, doi:10.1016/j.microc.2019.01.031.
50. Behbahani, M.; Najafi, F.; Bagheri, S.; Bojdi, M.K.; Salarian, M.; Bagheri, A. Application of surfactant assisted dispersive liquid–liquid microextraction as an efficient sample treatment technique for preconcentration and trace detection of zonisamide and carbamazepine in urine and plasma samples. *J. Chromatogr. A* **2013**, *1308*, 25–31, doi:10.1016/j.chroma.2013.07.088.
51. Budikayanti, A.; Chaliana, C.; Louisa, M.; Setiabudy, R. Development and validation of carbamazepine plasma concentrations measurement and its application on epilepsy patients. *Int. J. Pharm. Pharm. Sci.* **2017**, *9*, 87, doi:10.22159/ijpps.2017v9i9.19402.
52. Farouk, F.; ElKady, E.F.; Azzazy, H.M.E. Simultaneous UPLC-MS/MS determination of antiepileptic agents for dose adjustment. *Biomed. Chromatogr.* **2017**, *31*, e3921, doi:10.1002/bmc.3921.
53. Andonie, D.; Gáll, Z.; Bosa, P.; Dogaru, M.T.; Vancea, S. Simultaneous Determination of Carbamazepine and Carbamazepine-10,11-epoxide in Different Biological Matrices by LC-MS/MS. *J. Interdiscip. Med.* **2017**, *2*, 211–218, doi:10.1515/jim-2017-0075.
54. Wang, L.; Wang, J.; Zhang, J.; Jiang, Q.; Zhao, L.; Zhang, T. Simultaneous determination of topiramate, carbamazepine, oxcarbazepine and its major metabolite in human plasma by SFC-ESI-MS/MS with polarity switching: Application to therapeutic drug monitoring. *Arab. J. Chem.* **2019**, *12*, 4775–4783, doi:10.1016/j.arabjc.2016.09.016.
55. Ghafghazi, S.; Moini Zanjani, T.; Vosough, M.; Sabetkasaei, M. Interference-free Determination of Carbamazepine in Human Serum Using High Performance Liquid Chromatography: A Comprehensive Research with Three-way Calibration Methods. *Iran. J. Pharm. Res.* **2017**, *16*, 120–131.
56. Sultana, N.; Arayne, M.S.; Ali, S.N. An Ultra-sensitive LC Method for the Simultaneous Determination of Paracetamol, Carbamazepine, Losartan and Ciprofloxacin in Bulk Drug, Pharmaceutical Formulation and Human Serum by Programming the Detector. *AJAC* **2013**, *4*, 24–33, doi:10.4236/ajac.2013.41004.
57. Jiang, W.; Xia, T.; Yun, Y.; Li, M.; Zhang, F.; Gao, S.; Chen, W. UHPLC-MS/MS method for simultaneous determination of carbamazepine and its seven major metabolites in serum of epileptic patients. *J. Chromatogr. B* **2019**, *1108*, 17–24, doi:10.1016/j.jchromb.2018.12.016.

58. Feriduni, B.; Farajzadeh, M.A.; Jouyban, A. Determination of Two Antiepileptic Drugs in Urine by Homogenous Liquid-Liquid Extraction Performed in A Narrow Tube Combined with Dispersive Liquid-liquid Microextraction Followed by Gas Chromatography-flame Ionization Detection. *Iran. J. Pharm. Res.* **2019**, doi:10.22037/ijpr.2019.1100635.
59. Dziurkowska, E.; Wesolowski, M. Deproteinization as a Rapid Method of Saliva Purification for the Determination of Carbamazepine and Carbamazepine-10,11 Epoxide. *J. Clin. Med.* **2020**, *9*, 915, doi:10.3390/jcm9040915.
60. Carvalho, J.; Rosado, T.; Barroso, M.; Gallardo, E. Determination of Antiepileptic Drugs Using Dried Saliva Spots. *J. Anal. Toxicol.* **2019**, *43*, 61–71, doi:10.1093/jat/bky064.
61. Hatefi, A.; Rahimpour, E.; Khoubnasabjafari, M.; Edalat, M.; Jouyban-Gharamaleki, V.; Alvani-Alamdari, S.; Nokhodchi, A.; Pournaghi-Azar, M.H.; Jouyban, A. A single-shot diagnostic platform based on copper nanoclusters coated with cetyl trimethylammonium bromide for determination of carbamazepine in exhaled breath condensate. *Microchim. Acta* **2019**, *186*, 194, doi:10.1007/s00604-019-3278-z.
62. Khoubnasabjafari, M.; Rahimpour, E.; Jouyban, A. Exhaled breath condensate as an alternative sample for drug monitoring. *Bioanalysis* **2018**, *10*, 61–64, doi:10.4155/bio-2017-0205.
63. Kong, S.T.; Lim, S.-H.; Lee, W.B.; Kumar, P.K.; Wang, H.Y.S.; Ng, Y.L.S.; Wong, P.S.; Ho, P.C. Clinical Validation and Implications of Dried Blood Spot Sampling of Carbamazepine, Valproic Acid and Phenytoin in Patients with Epilepsy. *PLoS ONE* **2014**, *9*, e108190, doi:10.1371/journal.pone.0108190.
64. Linder, C.; Neideman, M.; Wide, K.; von Euler, M.; Gustafsson, L.L.; Pohanka, A. Dried Blood Spot Self-Sampling by Guardians of Children With Epilepsy Is Feasible: Comparison With Plasma for Multiple Antiepileptic Drugs. *Ther. Drug Monit.* **2019**, *41*, 509–518, doi:10.1097/FTD.0000000000000605.
65. Ferreira, A.; Rodrigues, M.; Oliveira, P.; Francisco, J.; Fortuna, A.; Rosado, L.; Rosado, P.; Falcão, A.; Alves, G. Liquid chromatographic assay based on microextraction by packed sorbent for therapeutic drug monitoring of carbamazepine, lamotrigine, oxcarbazepine, phenobarbital, phenytoin and the active metabolites carbamazepine-10,11-epoxide and licarbazepine. *J. Chromatogr. B* **2014**, *971*, 20–29, doi:10.1016/j.jchromb.2014.09.010.
66. Mano, Y. LC–MS–MS Determination of Oxcarbazepine and an Active Metabolite in Human Plasma for Clinical Application. *J. Chromatogr. Sci.* **2018**, *56*, 687–694, doi:10.1093/chromsci/bmy040.
67. Shibata, M.; Hashi, S.; Nakanishi, H.; Masuda, S.; Katsura, T.; Yano, I. Detection of 22 antiepileptic drugs by ultra-performance liquid chromatography coupled with tandem mass spectrometry applicable to routine therapeutic drug monitoring: UPLC-MS/MS method for detection of 22 antiepileptic drugs. *Biomed. Chromatogr.* **2012**, *26*, 1519–1528, doi:10.1002/bmc.2726.
68. May, T.W.; Korn-Merker, E.; Rambeck, B. Clinical Pharmacokinetics of Oxcarbazepine: *Clin. Pharmacokinet.* **2003**, *42*, 1023–1042, doi:10.2165/00003088-200342120-00002.
69. Gierbolini, J.; Giarratano, M.; Benbadis, S.R. Carbamazepine-related antiepileptic drugs for the treatment of epilepsy — A comparative review. *Expert Opin. Pharmacother.* **2016**, *17*, 885–888, doi:10.1517/14656566.2016.1168399.
70. Serralheiro, A.; Alves, G.; Fortuna, A.; Rocha, M.; Falcão, A. First HPLC–UV method for rapid and simultaneous quantification of phenobarbital, primidone, phenytoin, carbamazepine, carbamazepine-10,11-epoxide, 10,11-trans-dihydroxy-10,11-dihydrocarbamazepine, lamotrigine, oxcarbazepine and licarbazepine in human plasma. *J. Chromatogr. B* **2013**, *925*, 1–9, doi:10.1016/j.jchromb.2013.02.026.
71. Jin, S.; Zhao, Q.; Zhang, D.; Zhao, Z.; Mei, S. Development and validation of an improved HPLC-UV method for simultaneous determination of lamotrigine and oxcarbazepine and its active metabolite 10,11-dihydro-10-hydroxycarbamazepine in human blood plasma and comparison with an UHPLC-MS/MS method. *J. Anal. Sci. Technol.* **2019**, *10*, 36, doi:10.1186/s40543-019-0198-9.
72. Fortuna, A.; Sousa, J.; Alves, G.; Falcão, A.; Soares-da-Silva, P. Development and validation of an HPLC-UV method for the simultaneous quantification of carbamazepine, oxcarbazepine, eslicarbazepine acetate and their main metabolites in human plasma. *Anal. Bioanal. Chem.* **2010**, *397*, 1605–1615, doi:10.1007/s00216-010-3673-0.

73. Loureiro, A.I.; Fernandes-Lopes, C.; Wright, L.C.; Soares-da-Silva, P. Development and validation of an enantioselective liquid-chromatography/tandem mass spectrometry method for the separation and quantification of eslicarbazepine acetate, eslicarbazepine, R-licarbazepine and oxcarbazepine in human plasma. *J. Chromatogr. B* **2011**, *879*, 2611–2618, doi:10.1016/j.jchromb.2011.07.019.
74. Dupouey, J.; Doudka, N.; Belo, S.; Blin, O.; Guilhaumou, R. Simultaneous determination of four antiepileptic drugs in human plasma samples using an ultra-high-performance liquid chromatography tandem mass spectrometry method and its application in therapeutic drug monitoring: Simultaneous quantification of antiepileptic drugs by LC-MS/MS. *Biomed. Chromatogr.* **2016**, *30*, 2053–2060, doi:10.1002/bmc.3789.
75. Palte, M.J.; Basu, S.S.; Dahlin, J.L.; Gencheva, R.; Mason, D.; Jarolim, P.; Petrides, A.K. Development and Validation of an Ultra-Performance Liquid Chromatography–Tandem Mass Spectrometry Method for the Concurrent Measurement of Gabapentin, Lamotrigine, Levetiracetam, Monohydroxy Derivative of Oxcarbazepine, and Zonisamide Concentrations in Serum in a Clinical Setting: *Ther. Drug Monit.* **2018**, *40*, 469–476, doi:10.1097/FTD.0000000000000516.
76. Rani, S.; Malik, A.K. A novel microextraction by packed sorbent-gas chromatography procedure for the simultaneous analysis of antiepileptic drugs in human plasma and urine: Sample Preparation. *J. Sep. Sci.* **2012**, *35*, 2970–2977, doi:10.1002/jssc.201200439.
77. Málaga, I.; Sánchez-Carpintero, R.; Roldán, S.; Ramos-Lizana, J.; García-Peñas, J.J. New antiepileptic drugs in pediatrics. *An. Pediatria* **2019**, *91*, 415e1–415e10, doi:10.1016/j.anpedi.2019.09.008.
78. Lattanzi, S.; Brigo, F.; Cagnetti, C.; Verrotti, A.; Zaccara, G.; Silvestrini, M. Eslicarbazepine acetate in the treatment of adults with partial-onset epilepsy: An evidence-based review of efficacy, safety and place in therapy. *Core Evid.* **2018**, *13*, 21–31, doi:10.2147/CE.S142858.
79. Bialer, M.; Soares-da-Silva, P. Pharmacokinetics and drug interactions of eslicarbazepine acetate: Pharmacokinetics and Drug Interactions of ESL. *Epilepsia* **2012**, *53*, 935–946, doi:10.1111/j.1528-1167.2012.03519.x.
80. Galiana, G.L.; Gauthier, A.C.; Mattson, R.H. Eslicarbazepine Acetate: A New Improvement on a Classic Drug Family for the Treatment of Partial-Onset Seizures. *Drugs R&D* **2017**, *17*, 329–339, doi:10.1007/s40268-017-0197-5.
81. Deeb, S.; McKeown, D.A.; Torrance, H.J.; Wylie, F.M.; Logan, B.K.; Scott, K.S. Simultaneous Analysis of 22 Antiepileptic Drugs in Postmortem Blood, Serum and Plasma Using LC–MS–MS with a Focus on Their Role in Forensic Cases. *J. Anal. Toxicol.* **2014**, *38*, 485–494, doi:10.1093/jat/bku070.
82. Tolbert, D.; Larsen, F. A Comprehensive Overview of the Clinical Pharmacokinetics of Clobazam. *J. Clin. Pharmacol.* **2019**, *59*, 7–19, doi:10.1002/jcph.1313.
83. Déglon, J.; Versace, F.; Lauer, E.; Widmer, C.; Mangin, P.; Thomas, A.; Staub, C. Rapid LC–MS/MS quantification of the major benzodiazepines and their metabolites on dried blood spots using a simple and cost-effective sample pretreatment. *Bioanalysis* **2012**, *4*, 1337–1350, doi:10.4155/bio.12.42.
84. Diniz, M.E.R.; Dias, N.L.; Paulo, B.P.; Andrade, F.V.; Mateo, E.C.; Ferreira, A.C.S. Development and validation of method for the determination of the benzodiazepines clonazepam, clobazam and N-Desmethylclobazam in serum by LC-MS/MS and its application in clinical routine. *Br. J. Anal. Chem.* **2017**, *4*, 8–16.
85. Mikayelyan, A.; Aleksanyan, A.; Sargsyan, M.; Gevorgyan, A.; Zakaryan, H.; Harutyunyan, A.; Zhamharyan, L.; Armoudjian, Y.; Margaryan, T. Protein precipitation method for determination of Clobazam and N-desmethylclobazam in human plasma by LC–MS/MS. *Biomed. Chromatogr.* **2020**, *34*, doi:10.1002/bmc.4710.
86. Winblad, B. Piracetam: A Review of Pharmacological Properties and Clinical Uses. *CNS Drug Rev.* **2006**, *11*, 169–182, doi:10.1111/j.1527-3458.2005.tb00268.x.
87. Sirotina, I.V.; Aleksandrova, Z.D.; Bogatyreva, N.V.; Gusev, V.A.; Smirnov, D.P.; Khodov, D.A.; Grandilevskaia, O.L. The results of the therapeutic monitoring of piracetam in parturients and newborn infants. *Eksp. Klin. Farm.* **1992**, *55*, 53–56.
88. Curticepean, A.; Imre, S. New validated method for piracetam HPLC determination in human plasma. *J. Biochem. Biophys. Methods* **2007**, *69*, 273–281, doi:10.1016/j.jbbm.2006.06.001.
89. Yeh, H.-H.; Yang, Y.-H.; Ko, J.-Y.; Chen, S.-H. Rapid determination of piracetam in human plasma and cerebrospinal fluid by micellar electrokinetic chromatography with sample direct injection. *J. Chromatogr. A* **2006**, *1120*, 27–34, doi:10.1016/j.chroma.2005.11.071.

90. Siddiqui, F.A.; Sher, N.; Shafi, N.; Wafa Sial, A.; Ahmad, M.; Mehjebeen; Naseem, H. Development of New Method for Simultaneous Analysis of Piracetam and Levetiracetam in Pharmaceuticals and Biological Fluids: Application in Stability Studies. *BioMed Res. Int.* **2014**, *2014*, 1–8, doi:10.1155/2014/758283.
91. Mendes, G.D.; Zaffalon, G.T.; Silveira, A.S.; Ramacciato, J.C.; Motta, R.H.L.; Gagliano-Jucá, T.; Lopes, A.G.; de Almeida Magalhães, J.C.; De Nucci, G. Assessment of pharmacokinetic interaction between piracetam and l-carnitine in healthy subjects: Piracetam and L-carnitine pharmacokinetic interaction study. *Biomed. Chromatogr.* **2016**, *30*, 536–542, doi:10.1002/bmc.3579.
92. Doheny, M.H.; O'Connell, M.T.; Patsalos, P.N. A High-performance Liquid-chromatographic Microanalytical Procedure for the Rapid Estimation of Piracetam in Plasma or Cerebrospinal Fluid. *J. Pharm. Pharmacol.* **1996**, *48*, 514–516, doi:10.1111/j.2042-7158.1996.tb05964.x.
93. Louchahi, K.; Tod, M.; Bonnardel, P.; Petitjean, O. Determination of piracetam in human plasma and urine by liquid chromatography. *J. Chromatogr. B Biomed. Sci. Appl.* **1995**, *663*, 385–389, doi:10.1016/0378-4347(94)00448-E.
94. Klein, P.; Diaz, A.; Gasalla, T.; Whitesides, J. A review of the pharmacology and clinical efficacy of brivaracetam. *Clin. Pharmacol. Adv. Appl.* **2018**, *10*, 1–22, doi:10.2147/CPAA.S114072.
95. Steinhoff, B.J.; Staack, A.M. Levetiracetam and brivaracetam: A review of evidence from clinical trials and clinical experience. *Adv. Neurol. Disord.* **2019**, *12*, 175628641987351, doi:10.1177/1756286419873518.
96. Sourbron, J.; Chan, H.; Wammes-van der Heijden, E.A.; Klarenbeek, P.; Wijnen, B.F.M.; de Haan, G.-J.; van der Kuy, H.; Evers, S.; Majoie, M. Review on the relevance of therapeutic drug monitoring of levetiracetam. *Seizure* **2018**, *62*, 131–135, doi:10.1016/j.seizure.2018.09.004.
97. Moseley, B.D.; Chanteux, H.; Nicolas, J.-M.; Laloyaux, C.; Gidal, B.; Stockis, A. A review of the drug–drug interactions of the antiepileptic drug brivaracetam. *Epilepsy Res.* **2020**, *163*, 106327, doi:10.1016/j.eplepsyres.2020.106327.
98. Howard, P.; Remi, J.; Remi, C.; Charlesworth, S.; Whalley, H.; Bhatia, R.; Hitchens, M.; Mihalyo, M.; Wilcock, A. Levetiracetam. *J. Pain Symptom Manag.* **2018**, *56*, 645–649, doi:10.1016/j.jpainsymman.2018.07.012.
99. Mohamed, S.; Riva, R.; Contin, M. Development and Validation of an UHPLC-MS/MS Assay for the Therapeutic Monitoring of Brivaracetam Plasma Concentrations in Patients with Epilepsy: *Ther. Drug Monit.* **2020**, *42*, 445–451, doi:10.1097/FTD.0000000000000726.
100. Yeap, L.-L.; Lo, Y.-L. Rapid and Simultaneous Quantification of Levetiracetam and Its Carboxylic Metabolite in Human Plasma by Liquid Chromatography Tandem Mass Spectrometry. *PLoS ONE* **2014**, *9*, e111544, doi:10.1371/journal.pone.0111544.
101. El-Yazbi, A.F.; Wagih, M.M.; Ibrahim, F.; Barary, M.A. Spectrofluorimetric Determination of Topiramate and Levetiracetam as Single Components in Tablet Formulations and in Human Plasma and Simultaneous Fourth Derivative Synchronous Fluorescence Determination of their Co-Administered Mixture in Human Plasma. *J. Fluoresc.* **2016**, *26*, 1225–1238, doi:10.1007/s10895-016-1810-7.
102. Iqbal, M.; Ezzeldin, E.; Al-Rashood, K.A. UPLC–MS/MS assay for identification and quantification of brivaracetam in plasma sample: Application to pharmacokinetic study in rats. *J. Chromatogr. B* **2017**, *1060*, 63–70, doi:10.1016/j.jchromb.2017.05.039.
103. Mohamed, F.A.; Ali, M.F.B.; Rageh, A.H.; Mostafa, A.M. Highly sensitive UHPLC–DAD method for simultaneous determination of two synergistically acting antiepileptic drugs; levetiracetam and lacosamide: Application to pharmaceutical tablets and human urine. *Biomed. Chromatogr.* **2019**, *33*, doi:10.1002/bmc.4554.
104. Sim, J.; Kim, E.; Yang, W.; Woo, S.; In, S. An LC–MS/MS method for the simultaneous determination of 15 antipsychotics and two metabolites in hair and its application to rat hair. *Forensic Sci. Int.* **2017**, *274*, 91–98, doi:10.1016/j.forsciint.2017.01.001.
105. Gonçalves, J.; Alves, G.; Bicker, J.; Falcão, A.; Fortuna, A. Development and full validation of an innovative HPLC-diode array detection technique to simultaneously quantify lacosamide, levetiracetam and zonisamide in human plasma. *Bioanalysis* **2018**, *10*, 541–557, doi:10.4155/bio-2017-0199.
106. Pucci, V.; Bugamelli, F.; Mandrioli, R.; Ferranti, A.; Kenndler, E.; Raggi, M.A. High-performance liquid chromatographic determination of Levetiracetam in human plasma: Comparison of different sample clean-up procedures. *Biomed. Chromatogr.* **2004**, *18*, 37–44, doi:10.1002/bmc.289.

107. Bourgogne, E.; Culot, B.; Dell'Aiera, S.; Chanteux, H.; Stockis, A.; Nicolas, J.-M. Off-line solid phase extraction and liquid chromatography-tandem mass spectrometry method for the quantitation of brivaracetam acid metabolites: Method validation and application to in vitro metabolism assays. *J. Chromatogr. B* **2018**, *1086*, 138–145, doi:10.1016/j.jchromb.2018.04.018.
108. Engelbrecht, L.; Grobler, C.J.; Rheeders, M. A simple and cost-effective HPLC-UV method for the detection of levetiracetam in plasma/serum of patients with epilepsy. *Biomed. Chromatogr.* **2017**, *31*, e3969, doi:10.1002/bmc.3969.
109. Mendoza Aguilera, M.; Bellés Medall, M.D.; Álvarez Martín, T.; Pascual Marmaneu, Ó.; Liñana Granell, C.; Ferrando Piqueres, R. Therapeutic drug monitoring of levetiracetam in daily clinical practice: High-performance liquid chromatography versus immunoassay. *Eur. J. Hosp. Pharm.* **2020**, *27*, e2–e6, doi:10.1136/ejhpharm-2018-001616.
110. Kalaria, S.N.; Dahmane, E.; Armahizer, M.; McCarthy, P.; Gopalakrishnan, M. Development and validation of a HPLC-UV assay for quantification of levetiracetam concentrations in critically ill patients undergoing continuous renal replacement therapy. *Biomed. Chromatogr.* **2018**, *32*, e4257, doi:10.1002/bmc.4257.
111. Olah, E.; Bacsoi, G.; Fekete, J.; Sharma, V.K. Determination of ng/mL Levetiracetam using Ultra-High-Performance Liquid Chromatography-Photodiode Absorbance. *J. Chromatogr. Sci.* **2012**, *50*, 253–258, doi:10.1093/chromsci/bmr053.
112. Reineks, E.Z.; Lawson, S.E.; Lembright, K.E.; Wang, S. Performance Characteristics of a New Levetiracetam Immunoassay and Method Comparison With a High-Performance Liquid Chromatography Method. *Ther. Drug Monit.* **2011**, *33*, 124–127, doi:10.1097/FTD.0b013e3182048e05.
113. Bae, E.-K.; Lee, J.; Shin, J.-W.; Moon, J.; Lee, K.-J.; Shin, Y.-W.; Kim, T.-J.; Shin, D.; Jang, I.-J.; Lee, S.K. Factors influencing topiramate clearance in adult patients with epilepsy: A population pharmacokinetic analysis. *Seizure* **2016**, *37*, 8–12, doi:10.1016/j.seizure.2016.02.002.
114. Milosheška, D.; Vovk, T.; Grabnar, I.; Roškar, R. Simple and sensitive high performance liquid chromatography method with fluorescence detection for therapeutic drug monitoring of topiramate. *ACSi* **2015**, *62*, 411–419, doi:10.17344/acsi.2014.382.
115. Milosheška, D.; Roškar, R. A novel LC–MS/MS method for the simultaneous quantification of topiramate and its main metabolites in human plasma. *J. Pharm. Biomed. Anal.* **2017**, *138*, 180–188, doi:10.1016/j.jpba.2017.02.003.
116. Hahn, R.Z.; Antunes, M.V.; Costa Arnhold, P.; Andriguetti, N.B.; Verza, S.G.; Linden, R. Determination of topiramate in dried blood spots using single-quadrupole gas chromatography–mass spectrometry after flash methylation with trimethylanilinium hydroxide. *J. Chromatogr. B* **2017**, *1046*, 131–137, doi:10.1016/j.jchromb.2017.01.047.
117. Ni, Y.; Zhou, Y.; Xu, M.; He, X.; Li, H.; Haseeb, S.; Chen, H.; Li, W. Simultaneous determination of phentermine and topiramate in human plasma by liquid chromatography–tandem mass spectrometry with positive/negative ion-switching electrospray ionization and its application in pharmacokinetic study. *J. Pharm. Biomed. Anal.* **2015**, *107*, 444–449, doi:10.1016/j.jpba.2015.01.035.
118. Ishikawa, A.A.; da Silva, R.M.; Santos, M.S.F.; da Costa, E.T.; Sakamoto, A.C.; Carrilho, E.; de Gaitani, C.M.; Garcia, C.D. Determination of topiramate by capillary electrophoresis with capacitively-coupled contactless conductivity detection: A powerful tool for therapeutic monitoring in epileptic patients. *Electrophoresis* **2018**, *39*, 2598–2604, doi:10.1002/elps.201800046.
119. French, J.; Smith, M.; Faught, E.; Brown, L. Practice advisory: The use of felbamate in the treatment of patients with intractable epilepsy: Report of the Quality Standards Subcommittee of the American Academy of Neurology and the American Epilepsy Society. *Neurology* **1999**, *52*, 1540–1540, doi:10.1212/WNL.52.8.1540.
120. Harty, T.P.; Rogawski, M.A. Felbamate block of recombinant N-methyl-d-aspartate receptors: Selectivity for the NR2B subunit. *Epilepsy Res.* **2000**, *39*, 47–55, doi:10.1016/S0920-1211(99)00108-4.
121. Krasowski, M.D. Therapeutic Drug Monitoring of the Newer Anti-Epilepsy Medications. *Pharmaceuticals* **2010**, *3*, 1909–1935, doi:10.3390/ph3061909.
122. Gur, P.; Poklis, A.; Saady, J.; Costantino, A. Chromatographic Procedures for the Determination of Felbamate in Serum. *J. Anal. Toxicol.* **1995**, *19*, 499–503, doi:10.1093/jat/19.6.499.

123. Contin, M.; Balboni, M.; Callegati, E.; Candela, C.; Albani, F.; Riva, R.; Baruzzi, A. Simultaneous liquid chromatographic determination of lamotrigine, oxcarbazepine monohydroxy derivative and felbamate in plasma of patients with epilepsy. *J. Chromatogr. B* **2005**, *828*, 113–117, doi:10.1016/j.jchromb.2005.09.009.
124. Chateauvieux, S.; Morceau, F.; Dicato, M.; Diederich, M. Molecular and Therapeutic Potential and Toxicity of Valproic Acid. *J. Biomed. Biotechnol.* **2010**, *2010*, 1–18, doi:10.1155/2010/479364.
125. Ghodke-Puranik, Y.; Thorn, C.F.; Lamba, J.K.; Leeder, J.S.; Song, W.; Birnbaum, A.K.; Altman, R.B.; Klein, T.E. Valproic acid pathway: Pharmacokinetics and pharmacodynamics. *Pharm. Genom.* **2013**, *23*, 236–241, doi:10.1097/FPC.0b013e32835ea0b2.
126. Perucca, E. Clinically relevant drug interactions with antiepileptic drugs. *Br. J. Clin. Pharm.* **2006**, *61*, 246–255, doi:10.1111/j.1365-2125.2005.02529.x.
127. Feriduni, B.; Barzegar, M.; Sadeghvand, S.; Shiva, S.; Khoubnasabjafari, M.; Jouyban, A. Determination of valproic acid and 3-heptanone in plasma using air-assisted liquid-liquid microextraction with the assistance of vortex: Application in the real samples. *Bioimpacts* **2019**, *9*, 105–113, doi:10.15171/bi.2019.14.
128. Fazeli-Bakhtiyari, R.; Panahi-Azar, V.; Sorouraddin, M.H.; Jouyban, A. Determination of valproic acid in human plasma using dispersive liquid-liquid microextraction followed by gas chromatography-flame ionization detection. *Iran. J. Basic Med. Sci.* **2015**, *18*, 979–988.
129. Mostafa, M.S.; Elshafie, H.S.; Ghaleb, S. A rapid and simple procedure for monitoring valproic acid by gas chromatography. *J. Biol. Res.* **2018**, *90*, doi:10.4081/jbr.2017.6359.
130. Harahap, Y.; Ikhsan, M. Determination of Valproic Acid without Derivatization in Human Plasma using High Performance Liquid Chromatography-Photodiode Array. *J. Glob. Pharma Technol.* **2017**, *6*, 82–89.
131. Dwivedi, R.; Gupta, Y.K.; Singh, M.; Joshi, R.; Tiwari, P.; Kaleekal, T.; Tripathi, M. Correlation of saliva and serum free valproic acid concentrations in persons with epilepsy. *Seizure* **2015**, *25*, 187–190, doi:10.1016/j.seizure.2014.10.010.
132. Lu, H.; Su, C.; Yin, L.; Gu, L.; Gu, J.; Chen, X. Liquid chromatography–tandem mass spectrometry method for simultaneous determination of valproic acid and its enantiomers in epilepsy patient plasma. *J. Pharm. Anal.* **2016**, *6*, 112–116, doi:10.1016/j.jpha.2015.11.006.
133. Zhao, M.; Zhang, T.; Li, G.; Qiu, F.; Sun, Y.; Zhao, L. Simultaneous Determination of Valproic Acid and Its Major Metabolites by UHPLC-MS/MS in Chinese Patients: Application to Therapeutic Drug Monitoring. *J. Chromatogr. Sci.* **2016**, *55*, doi:10.1093/chromsci/bmw199.
134. Wang, Z.; Yun, Y.; Xie, X.; You, C.; Miao, H.; Zhang, F.; Gao, S.; Chen, W. Comparison of LC-MS/MS vs chemiluminescent microparticle immunoassay in measuring the valproic acid concentration in plasma of epilepsy patients in a new perspective. *J. Clin. Lab. Anal.* **2018**, *32*, e22157, doi:10.1002/jcla.22157.
135. Zhao, M.; Li, G.; Qiu, F.; Sun, Y.; Xu, Y.; Zhao, L. Development and Validation of a Simple and Rapid UPLC–MS Assay for Valproic Acid and Its Comparison With Immunoassay and HPLC Methods: *Ther. Drug Monit.* **2016**, *38*, 246–252, doi:10.1097/FTD.0000000000000256.
136. Gajcy, K.; Lochynski, S.; Librowski, T. A Role of GABA Analogues in the Treatment of Neurological Diseases. *Curr. Med. Chem.* **2010**, *17*, 2338–2347, doi:10.2174/092986710791698549.
137. Greenblatt, H.K.; Greenblatt, D.J. Gabapentin and Pregabalin for the Treatment of Anxiety Disorders. *Clin. Pharmacol. Drug Dev.* **2018**, *7*, 228–232, doi:10.1002/cpdd.446.
138. Bockbrader, H.N.; Wesche, D.; Miller, R.; Chapel, S.; Janiczek, N.; Burger, P. A Comparison of the Pharmacokinetics and Pharmacodynamics of Pregabalin and Gabapentin: *Clin. Pharmacokinet.* **2010**, *49*, 661–669, doi:10.2165/11536200-000000000-00000.
139. De La Vega, H.; Fox, K.; Pardi, J.; Santiago-Tirado, W.; Cooper, G. Validation of a High-throughput Screening and Quantification Method for the Determination of Gabapentinoids in Blood Using a Combination of LC-TOF-MS and LC-MS-MS. *J. Anal. Toxicol.* **2019**, *43*, 696–702, doi:10.1093/jat/bkz070.
140. Nahar, L.; Smith, A.; Patel, R.; Andrews, R.; Paterson, S. Validated Method for the Screening and Quantification of Baclofen, Gabapentin and Pregabalin in Human Post-Mortem Whole Blood Using Protein Precipitation and Liquid Chromatography–Tandem Mass Spectrometry. *J. Anal. Toxicol.* **2017**, *41*, 441–450, doi:10.1093/jat/bkx019.
141. Hložek, T.; Bursová, M.; Coufal, P.; Čabala, R.; Gabapentin, Pregabalin and Vigabatrin Quantification in Human Serum by GC–MS After Hexyl Chloroformate Derivatization. *J. Anal. Toxicol.* **2016**, *40*, 749–753, doi:10.1093/jat/bkw070.

142. Sadones, N.; Van Bever, E.; Van Bortel, L.; Lambert, W.E.; Stove, C.P. Dried blood spot analysis of gabapentin as a valid alternative for serum: A bridging study. *J. Pharm. Biomed. Anal.* **2017**, *132*, 72–76, doi:10.1016/j.jpba.2016.09.036.
143. Yoshikawa, N.; Naito, T.; Yagi, T.; Kawakami, J. A Validated Fluorometric Method for the Rapid Determination of Pregabalin in Human Plasma Applied to Patients With Pain. *Ther. Drug Monit.* **2016**, *38*, 628–633, doi:10.1097/FTD.0000000000000325.
144. Dwivedi, J.; Namdev, K.K.; Chilkoti, D.C.; Verma, S.; Sharma, S. An Improved LC-ESI-MS/MS Method to Quantify Pregabalin in Human Plasma and Dry Plasma Spot for Therapeutic Monitoring and Pharmacokinetic Applications: *Ther. Drug Monit.* **2018**, *40*, 610–619, doi:10.1097/FTD.0000000000000541.
145. Kostić, N.; Dotsikas, Y.; Jović, N.; Stevanović, G.; Malenović, A.; Medenica, M. Quantitation of pregabalin in dried blood spots and dried plasma spots by validated LC-MS/MS methods. *J. Pharm. Biomed. Anal.* **2015**, *109*, 79–84, doi:10.1016/j.jpba.2015.02.023.
146. Bauer, J. Tiagabine: Efficacy and safety in partial seizures—Current status. *Neuropsychiatr. Dis. Treat.* **2008**, *2008*, 731–736, doi:10.2147/NDT.S833.
147. Tolman, J.A.; Faulkner, M.A. Vigabatrin: A comprehensive review of drug properties including clinical updates following recent FDA approval. *Expert Opin. Pharmacother.* **2009**, *10*, 3077–3089, doi:10.1517/14656560903451690.
148. Police, A.; Shankar, V.K.; Narasimha Murthy, S. RP-HPLC method for simultaneous estimation of vigabatrin, gamma-aminobutyric acid and taurine in biological samples. *J. Chromatogr. B* **2018**, *1076*, 44–53, doi:10.1016/j.jchromb.2018.01.010.
149. Duhamel, P.; Ounissi, M.; Le Saux, T.; Bienayme, H.; Chiron, C.; Jullien, V. Determination of the R (–) and S (+)-enantiomers of vigabatrin in human plasma by ultra-high-performance liquid chromatography and tandem mass-spectrometry. *J. Chromatogr. B* **2017**, *1070*, 31–36, doi:10.1016/j.jchromb.2017.10.037.
150. Yasam, V.R.; Jakki, S.L.; Senthil, V.; Eswaramoorthy, M.; Shanmuganathan, S.; Arjunan, K.; Nanjan, M. A pharmacological overview of lamotrigine for the treatment of epilepsy. *Expert Rev. Clin. Pharmacol.* **2016**, *9*, 1533–1546, doi:10.1080/17512433.2016.1254041.
151. Jebabli, N.; Gaïes, E.; El Jebari, H.; Charfi, R.; Lakhal, M.; Klouz, A.; Trabelsi, S.; Salouage, I. Development and validation of a new HPLC method for determination of Lamotrigine and clinical application. *Tunis. Med.* **2015**, *93*, 565–568.
152. Baldelli, S.; Castoldi, S.; Charbe, N.; Cozzi, V.; Fucile, S.; Cattaneo, D.; Clementi, E. Comparison of the QMS Analyzer With HPLC-UV for the Quantification of Lamotrigine Concentrations in Human Plasma Samples: *Ther. Drug Monit.* **2015**, *37*, 689–694, doi:10.1097/FTD.0000000000000202.
153. Shaikh, A.S.; Li, W.; Yuan, G.; Gao, M.; Geng, C.; Guo, N.; Guo, R. Simple, rapid and highly sensitive HPLC method for measurement of Lamotrigine in human plasma and its clinical applications. *Pak. J. Pharm. Sci.* **2016**, *29*, 2245–2250.
154. Liu, L.; Zhao, L.; Wang, Q.; Qiu, F.; Wu, X.; Ma, Y. Influence of valproic acid concentration and polymorphism of UGT1A4\*3, UGT2B7 -161C > T and UGT2B7\*2 on serum concentration of lamotrigine in Chinese epileptic children. *Eur. J. Clin. Pharm.* **2015**, *71*, 1341–1347, doi:10.1007/s00228-015-1925-9.
155. Carlow, D.C.; Shi, H.; Schofield, R.C. Simultaneous Quantitation of Lamotrigine, Levetiracetam, 10-Hydroxycarbazepine, Topiramate, and Zonisamide in Serum Using HPLC-MS/MS. In *Clinical Applications of Mass Spectrometry in Drug Analysis; Methods in Molecular Biology*; Garg, U., Ed.; Humana Press: New York, NY, USA, 2016; Volume 1383, pp. 29–37, ISBN 978-1-4939-3251-1.
156. Domingues, D.S.; Pinto, M.A.L.; de Souza, I.D.; Hallak, J.E.C.; Crippa, J.A. de S.; Queiroz, M.E.C. Determination of Drugs in Plasma Samples by High-Performance Liquid Chromatography–Tandem Mass Spectrometry for Therapeutic Drug Monitoring of Schizophrenic Patients. *J. Anal. Toxicol.* **2015**, *40*, 28–36, doi:10.1093/jat/bkv107.
157. Kwan, S.-Y.; Chuang, Y.-C.; Huang, C.-W.; Chen, T.-C.; Jou, S.-B.; Dash, A. Zonisamide: Review of Recent Clinical Evidence for Treatment of Epilepsy. *CNS Neurosci.* **2015**, *21*, 683–691, doi:10.1111/cns.12418.
158. Lourenço, D.; Sarraguça, M.; Alves, G.; Coutinho, P.; Araujo, A.R.T.S.; Rodrigues, M. A novel HPLC method for the determination of zonisamide in human plasma using microextraction by packed sorbent optimised by experimental design. *Anal. Methods* **2017**, *9*, 5910–5919, doi:10.1039/C7AY01912B.
159. Mohammadi, B.; Jalili, R.; Bahrami, G.; Majnooni, M. Rapid and sensitive high performance liquid chromatographic determination of zonisamide in human serum application to a pharmacokinetic study. *Indian J. Pharm. Sci.* **2012**, *74*, 360, doi:10.4103/0250-474X.107073.



160. Ibrahim, F.A.; El-Yazbi, A.F.; Wagih, M.M.; Barary, M.A. Chromatographic determination of zonisamide, topiramate and sulpiride in plasma by a fluorescent 'turn-on' chemosensor. *Bioanalysis* **2017**, *9*, 1049–1064, doi:10.4155/bio-2017-0090.
161. Villanueva, V.; Giráldez, B.G.; Toledo, M.; De Haan, G.J.; Cumbo, E.; Gambardella, A.; De Backer, M.; Joeres, L.; Brunnert, M.; Dedeken, P.; et al. Lacosamide monotherapy in clinical practice: A retrospective chart review. *Acta Neurol. Scand.* **2018**, *138*, 186–194, doi:10.1111/ane.12920.
162. Harris, J.A.; Murphy, J.A. Lacosamide and Epilepsy: Lacosamide and Epilepsy. *CNS Neurosci. Ther.* **2011**, *17*, 678–682, doi:10.1111/j.1755-5949.2010.00198.x.
163. Bauer, S.; Rudd, G.; Mylius, V.; Hamer, H.M.; Rosenow, F. Lacosamide intoxication in attempted suicide. *Epilepsy Behav.* **2010**, *17*, 549–551, doi:10.1016/j.yebeh.2010.01.007.
164. Greenaway, C.; Ratnaraj, N.; Sander, J.W.; Patsalos, P.N. A High-Performance Liquid Chromatography Assay to Monitor the New Antiepileptic Drug Lacosamide in Patients With Epilepsy. *Ther. Drug Monit.* **2010**, *32*, 448–452, doi:10.1097/FTD.0b013e3181dcc5fb.
165. Mouskeftara, T.; Alexandridou, A.; Krokos, A.; Gika, H.; Mastrogianni, O.; Orfanidis, A.; Raikos, N. A Simple Method for the Determination of Lacosamide in Blood by GC–MS. *J. Forensic Sci.* **2020**, *65*, 288–294, doi:10.1111/1556-4029.14151.
166. Korman, E.; Langman, L.J.; Jannetto, P.J. High-Throughput Method for the Quantification of Lacosamide in Serum Using Ultrafast SPE-MS/MS: *Ther. Drug Monit.* **2015**, *37*, 126–131, doi:10.1097/FTD.0000000000000115.
167. Nikolaou, P.; Papoutsis, I.; Spiliopoulou, C.; Voudris, C.; Athanaselis, S. A fully validated method for the determination of lacosamide in human plasma using gas chromatography with mass spectrometry: Application for therapeutic drug monitoring: Gas Chromatography. *J. Sep. Sci.* **2015**, *38*, 260–266, doi:10.1002/jssc.201400858.
168. De Liso, P.; Moavero, R.; Coppola, G.; Curatolo, P.; Cusmai, R.; De Sarro, G.; Franzoni, E.; Vigevano, F.; Verrotti, A. Current role of perampanel in pediatric epilepsy. *Ital. J. Pediatr.* **2017**, *43*, 51, doi:10.1186/s13052-017-0368-6.
169. Patsalos, P.N. The clinical pharmacology profile of the new antiepileptic drug perampanel: A novel noncompetitive AMPA receptor antagonist. *Epilepsia* **2015**, *56*, 12–27, doi:10.1111/epi.12865.
170. Mano, Y.; Takenaka, O.; Kusano, K. HPLC with fluorescence detection assay of perampanel, a novel AMPA receptor antagonist, in human plasma for clinical pharmacokinetic studies: Perampanel assay in human plasma by HPLC with fluorescence detector. *Biomed. Chromatogr.* **2015**, *29*, 1589–1593, doi:10.1002/bmc.3463.
171. Franco, V.; Marchiselli, R.; Fattore, C.; Tartara, E.; De Sarro, G.; Russo, E.; Perucca, E. Development and Validation of an HPLC-UV Assay for the Therapeutic Monitoring of the New Antiepileptic Drug Perampanel in Human Plasma: *Ther. Drug Monit.* **2016**, *38*, 744–750, doi:10.1097/FTD.0000000000000350.
172. Mohamed, S.; Candela, C.; Riva, R.; Contin, M. Simple and rapid validated HPLC-fluorescence determination of perampanel in the plasma of patients with epilepsy. *Pract. Lab. Med.* **2018**, *10*, 15–20, doi:10.1016/j.plabm.2017.11.003.
173. Mano, Y.; Takenaka, O.; Kusano, K. High-performance liquid chromatography–tandem mass spectrometry method for the determination of perampanel, a novel  $\alpha$ -amino-3-hydroxy-5-methyl-4-isoxazolepropionic acid receptor antagonist in human plasma. *J. Pharm. Biomed. Anal.* **2015**, *107*, 56–62, doi:10.1016/j.jpba.2014.12.018.
174. Tůma, P.; Bursová, M.; Sommerová, B.; Horsley, R.; Čabalá, R.; Hložek, T. Novel electrophoretic acetonitrile-based stacking for sensitive monitoring of the antiepileptic drug perampanel in human serum. *J. Pharm. Biomed. Anal.* **2018**, *160*, 368–373, doi:10.1016/j.jpba.2018.08.006.
175. Franco, V.; Baruffi, K.; Marchiselli, R.; Crema, F.; Fattore, C.; Romigi, A.; De Giorgis, V.; Tartara, E.; Elia, M.; D'Avolio, A.; et al. Determination of Perampanel in Dried Plasma Spots: Applicability to Therapeutic Drug Monitoring. *Ther. Drug Monit.* **2020**, *42*, 309–314, doi:10.1097/FTD.0000000000000680.
176. Steinhoff, B.J.; Hübers, E.; Kurth, C.; Jürges (Kehl-Kork), U. Plasma concentration and clinical effects of perampanel—The Kork experience. *Seizure* **2019**, *67*, 18–22, doi:10.1016/j.seizure.2019.02.022.
177. Mazzucchelli, I.; Rapetti, M.; Fattore, C.; Franco, V.; Gatti, G.; Perucca, E. Development and validation of an HPLC–UV detection assay for the determination of rufinamide in human plasma and saliva. *Anal. Bioanal. Chem.* **2011**, *401*, 1013–1021, doi:10.1007/s00216-011-5126-9.
178. Meirinho, S.; Rodrigues, M.; Fortuna, A.; Falcão, A.; Alves, G. Novel bioanalytical method for the quantification of rufinamide in mouse plasma and tissues using HPLC-UV: A tool to support pharmacokinetic studies. *J. Chromatogr. B* **2019**, *1124*, 340–348, doi:10.1016/j.jchromb.2019.06.021.

179. Gáll, Z.; Vancea, S.; Dogaru, M.T.; Szilágyi, T. Liquid chromatography–mass spectrometric determination of rufinamide in low volume plasma samples. *J. Chromatogr. B* **2013**, *940*, 42–46, doi:10.1016/j.jchromb.2013.07.014.
180. Contin, M.; Mohamed, S.; Candela, C.; Albani, F.; Riva, R.; Baruzzi, A. Simultaneous HPLC–UV analysis of rufinamide, zonisamide, lamotrigine, oxcarbazepine monohydroxy derivative and felbamate in deproteinized plasma of patients with epilepsy. *J. Chromatogr. B* **2010**, *878*, 461–465, doi:10.1016/j.jchromb.2009.11.039.
181. Dalvi, A.V.; Uppuluri, C.T.; Bommireddy, E.P.; Ravi, P.R. Design of experiments-based RP–HPLC bioanalytical method development for estimation of Rufinamide in rat plasma and brain and its application in pharmacokinetic study. *J. Chromatogr. B* **2018**, *1102–1103*, 74–82, doi:10.1016/j.jchromb.2018.10.014.
182. Fisher, J.L. The effects of stiripentol on GABAA receptors: Stiripentol and GABAA Receptors. *Epilepsia* **2011**, *52*, 76–78, doi:10.1111/j.1528-1167.2011.03008.x.
183. Eschbach, K.; Knupp, K.G. Stiripentol for the treatment of seizures in Dravet syndrome. *Expert Rev. Clin. Pharmacol.* **2019**, *12*, 379–388, doi:10.1080/17512433.2019.1605904.
184. Takahashi, R.; Imai, K.; Yamamoto, Y.; Takahashi, Y.; Hamano, S.; Yoshida, H. Determination of Stiripentol in Plasma by High-performance Liquid Chromatography with Fluorescence Detection. *Jpn. J. Pharm. Health Care Sci.* **2015**, *41*, 643–650, doi:10.5649/jjphcs.41.643.
185. Vossler, D.G. Remarkably High Efficacy of Cenobamate in Adults With Focal-Onset Seizures: A Double-Blind, Randomized, Placebo-Controlled Trial. *Epilepsy Curr* **2020**, *20*, 85–87, doi:10.1177/1535759720903032.
186. Oh, J.-H.; Jeong, J.-W.; Ji, Y.-G.; Shin, Y.-M.; Lee, K.-R.; Hyung Cho, K.; Koo, T.-S. Development of a liquid chromatography-tandem mass spectrometry method for assaying cenobamate in rat plasma. *J. Liq. Chromatogr. Relat. Technol.* **2018**, *41*, 992–997, doi:10.1080/10826076.2018.1547743.
187. Vernillet, L.; Greene, S.A.; Kim, H.W.; Melnick, S.M.; Glenn, K. Mass Balance, Metabolism, and Excretion of Cenobamate, a New Antiepileptic Drug, After a Single Oral Administration in Healthy Male Subjects. *Eur. J. Drug Metab. Pharm.* **2020**, *45*, 513–522, doi:10.1007/s13318-020-00615-7.
188. Patsalos, P.N.; Zugman, M.; Lake, C.; James, A.; Ratnaraj, N.; Sander, J.W. Serum protein binding of 25 antiepileptic drugs in a routine clinical setting: A comparison of free non-protein-bound concentrations. *Epilepsia* **2017**, *58*, 1234–1243, doi:10.1111/epi.13802.
189. Tuchila, C.; Baconi, D.; Pirvu, C.; Balalau, D.; Vlasceanu, A.; Stan, M.; Balalau, C. Therapeutic drug monitoring and methods of quantitation for carbamazepine. *J. Mind Med. Sci.* **2017**, *4*, 100–114, doi:10.22543/7674.42.P100114.
190. Raj Panday, D.; Panday, K.R.; Basnet, M.; Kafle, S.; Shah, B.; Rauniar, G. Therapeutic Drug Monitoring of Carbamazepine. *Int. J. Neurorehabilit. Eng.* **2017**, *4*, doi:10.4172/2376-0281.1000245.
191. Rosati, A.; De Masi, S.; Guerrini, R. Antiepileptic Drug Treatment in Children with Epilepsy. *CNS Drugs* **2015**, *29*, 847–863, doi:10.1007/s40263-015-0281-8.
192. Łuszczki, J.J. Third-generation antiepileptic drugs: Mechanisms of action, pharmacokinetics and interactions. *Pharmacol. Rep.* **2009**, *61*, 197–216, doi:10.1016/S1734-1140(09)70024-6.
193. Quintero, G.C. Review about gabapentin misuse, interactions, contraindications and side effects. *J. Exp. Pharmacol.* **2017**, *9*, 13–21, doi:10.2147/JEP.S124391.
194. Curia, G.; Biagini, G.; Perucca, E.; Avoli, M. Lacosamide: A New Approach to Target Voltage-Gated Sodium Currents in Epileptic Disorders. *CNS Drugs* **2009**, *23*, 555–568, doi:10.2165/00023210-200923070-00002.
195. Biton, V. Pharmacokinetics, toxicology and safety of lamotrigine in epilepsy. *Expert Opin. Drug Metab. Toxicol.* **2006**, *2*, 1009–1018, doi:10.1517/17425255.2.6.1009.
196. Zaccara, G.; Perucca, E. Interactions between antiepileptic drugs, and between antiepileptic drugs and other drugs. *Epileptic Disord.* **2014**, *16*, 409–431, doi:10.1684/epd.2014.0714.
197. Panebianco, M.; Prabhakar, H.; Marson, A.G. Rufinamide add-on therapy for refractory epilepsy. *Cochrane Database Syst. Rev.* **2018**, *4*, CD011772, doi:10.1002/14651858.CD011772.pub2.
198. Hsieh, D.T.; Thiele, E.A. Efficacy and safety of rufinamide in pediatric epilepsy. *Adv. Neurol. Disord.* **2013**, *6*, 189–198, doi:10.1177/1756285613481083.

199. Luszczki, J.J.; Ratnaraj, N.; Patsalos, P.N.; Czuczwar, S.J. Characterization of the Anticonvulsant, Behavioral and Pharmacokinetic Interaction Profiles of Stiripentol in Combination with Clonazepam, Ethosuximide, Phenobarbital, and Valproate Using Isobolographic Analysis. *Epilepsia* **2006**, *47*, 1841–1854, doi:10.1111/j.1528-1167.2006.00825.x.
200. Chiron, C. Stiripentol for the treatment of Dravet syndrome. *Orphan Drugs Res. Rev.* **2014**, *4*, 29–38, doi:10.2147/ODRR.S47619.
201. Buck, M.L.; Goodkin, H.P. Stiripentol: A Novel Antiseizure Medication for the Management of Dravet Syndrome. *Ann. Pharm.* **2019**, *53*, 1136–1144, doi:10.1177/1060028019856008.
202. Wang, X.; Ratnaraj, N.; Patsalos, P.N. The pharmacokinetic inter-relationship of tiagabine in blood, cerebrospinal fluid and brain extracellular fluid (frontal cortex and hippocampus). *Seizure* **2004**, *13*, 574–581, doi:10.1016/j.seizure.2004.01.007.
203. Ben-Menachem, E. Mechanism of action of vigabatrin: Correcting misperceptions: Vigabatrin mechanism of action. *Acta Neurol. Scand.* **2011**, *124*, 5–15, doi:10.1111/j.1600-0404.2011.01596.x.
